# Supplementary material for: Phase transfer agent assisted biphasic CuAAC reaction
Source: Royal Society of Chemistry journal article supplement (doi:10.1039/c4ra03356f), 2014-01-01

## Supporting Information

# Phase Transfer Agent Assisted Biphasic CuAAC Reaction

*Jae Hyun Kim and Sanghee Kim\**

College of Pharmacy, Seoul National University, Seoul 151-742, Korea

pennkim@snu.ac.kr

## Contents

|                                                             |     |                                                             |     |
|-------------------------------------------------------------|-----|-------------------------------------------------------------|-----|
| <sup>1</sup> H and <sup>13</sup> C NMR Spectra of <b>4a</b> | S1  | <sup>1</sup> H and <sup>13</sup> C NMR Spectra of <b>4l</b> | S12 |
| <sup>1</sup> H and <sup>13</sup> C NMR Spectra of <b>4b</b> | S2  | <sup>1</sup> H and <sup>13</sup> C NMR Spectra of <b>4m</b> | S13 |
| <sup>1</sup> H and <sup>13</sup> C NMR Spectra of <b>4c</b> | S3  | <sup>1</sup> H and <sup>13</sup> C NMR Spectra of <b>4n</b> | S14 |
| <sup>1</sup> H and <sup>13</sup> C NMR Spectra of <b>4d</b> | S4  | <sup>1</sup> H and <sup>13</sup> C NMR Spectra of <b>4o</b> | S15 |
| <sup>1</sup> H and <sup>13</sup> C NMR Spectra of <b>4e</b> | S5  | <sup>1</sup> H and <sup>13</sup> C NMR Spectra of <b>4p</b> | S16 |
| <sup>1</sup> H and <sup>13</sup> C NMR Spectra of <b>4f</b> | S6  | <sup>1</sup> H and <sup>13</sup> C NMR Spectra of <b>4q</b> | S17 |
| <sup>1</sup> H and <sup>13</sup> C NMR Spectra of <b>4g</b> | S7  | <sup>1</sup> H and <sup>13</sup> C NMR Spectra of <b>4r</b> | S18 |
| <sup>1</sup> H and <sup>13</sup> C NMR Spectra of <b>4h</b> | S8  | <sup>1</sup> H and <sup>13</sup> C NMR Spectra of <b>4s</b> | S19 |
| <sup>1</sup> H and <sup>13</sup> C NMR Spectra of <b>4i</b> | S9  | <sup>1</sup> H and <sup>13</sup> C NMR Spectra of <b>4t</b> | S20 |
| <sup>1</sup> H and <sup>13</sup> C NMR Spectra of <b>4j</b> | S10 | <sup>1</sup> H and <sup>13</sup> C NMR Spectra of <b>7</b>  | S21 |
| <sup>1</sup> H and <sup>13</sup> C NMR Spectra of <b>4k</b> | S11 | <sup>1</sup> H and <sup>13</sup> C NMR Spectra of <b>5</b>  | S22 |

# $^1\text{H}$ NMR and $^{13}\text{C}$ NMR Spectra

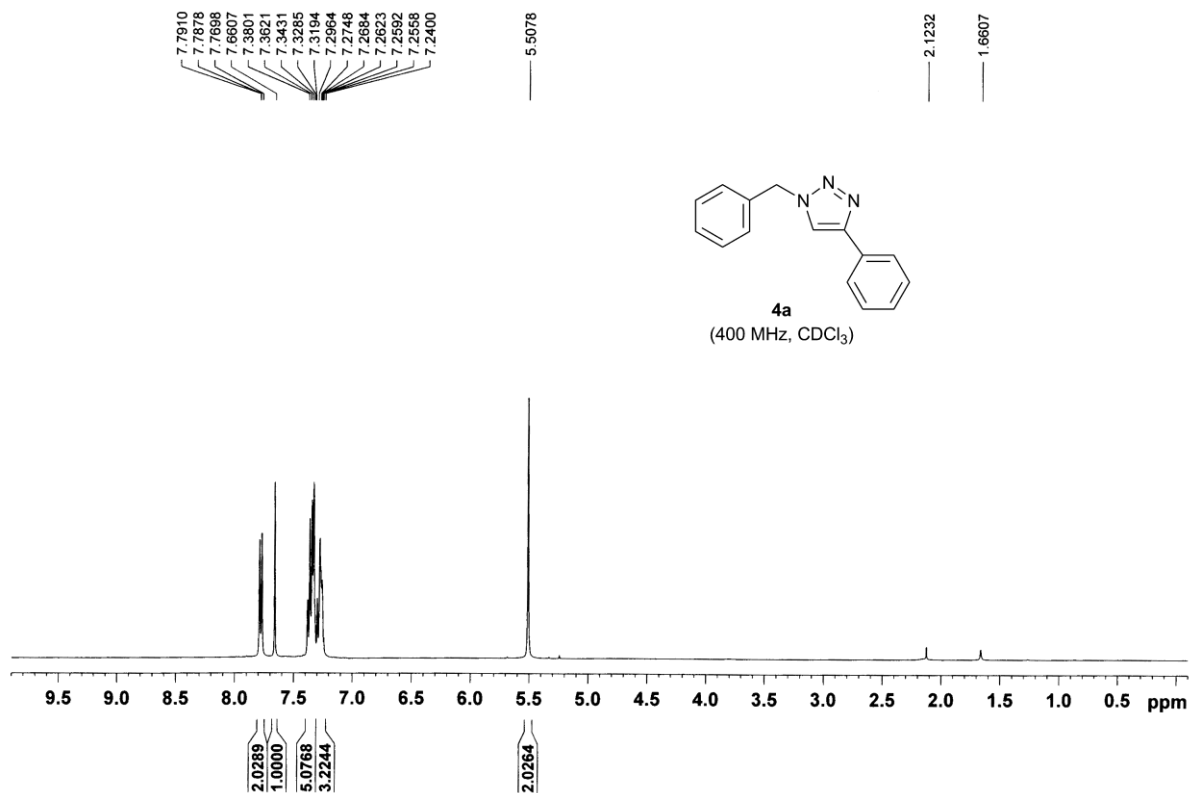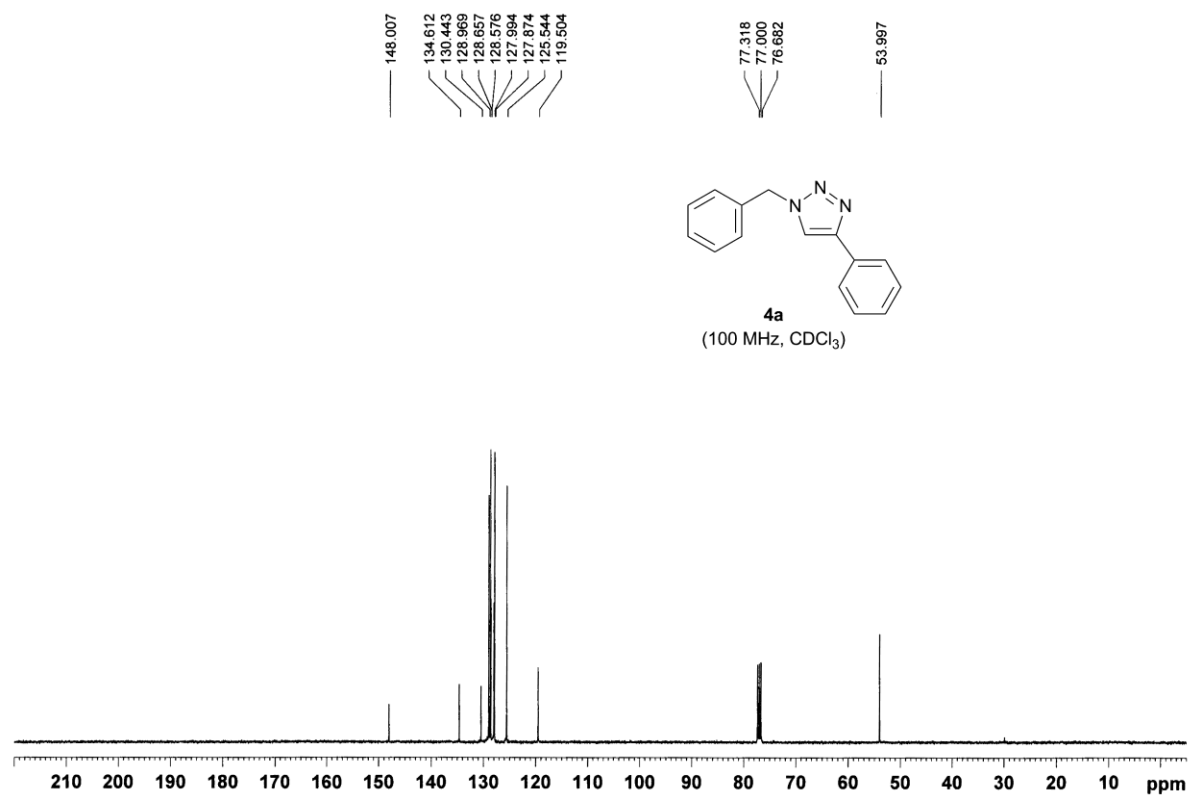

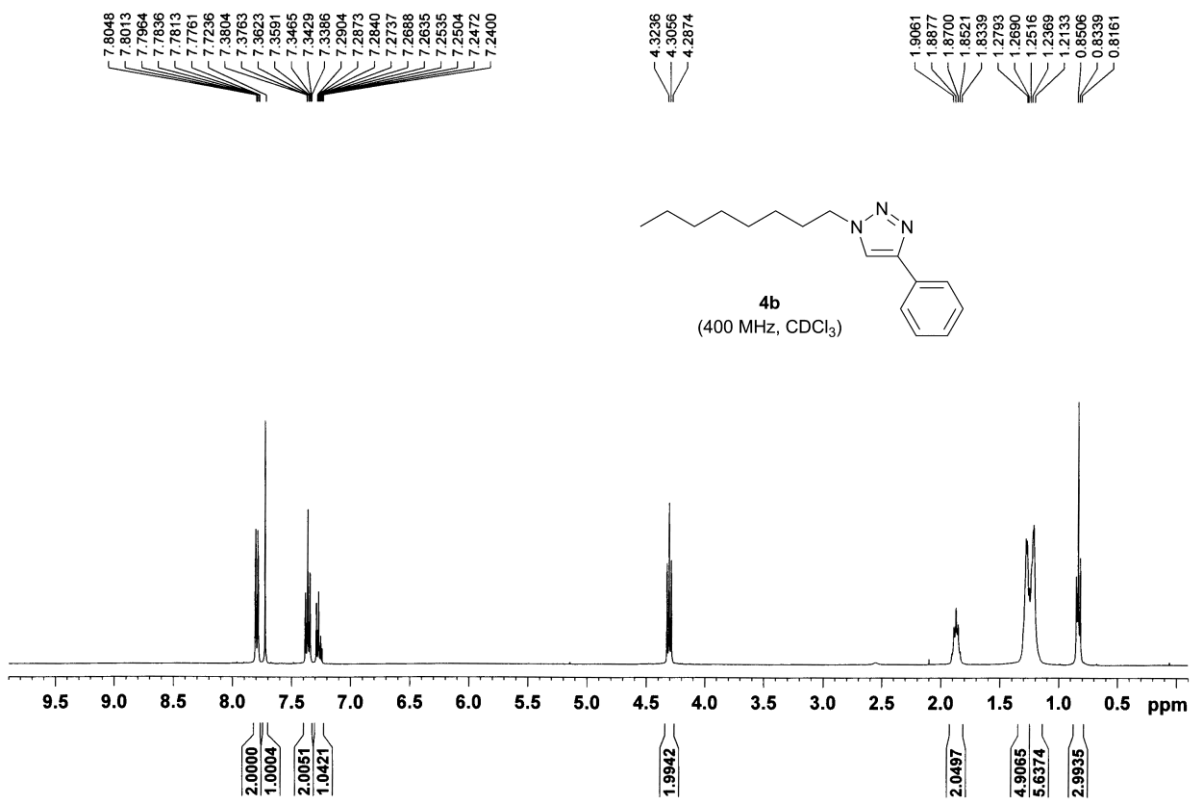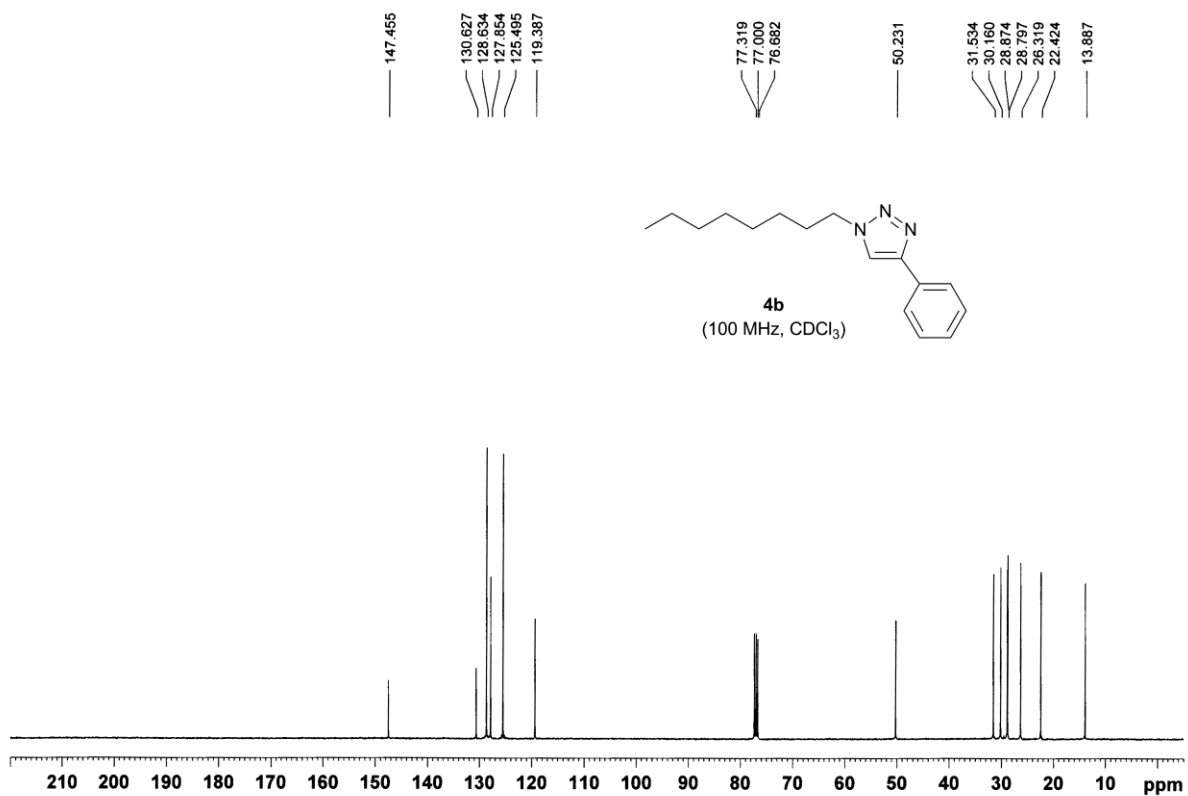

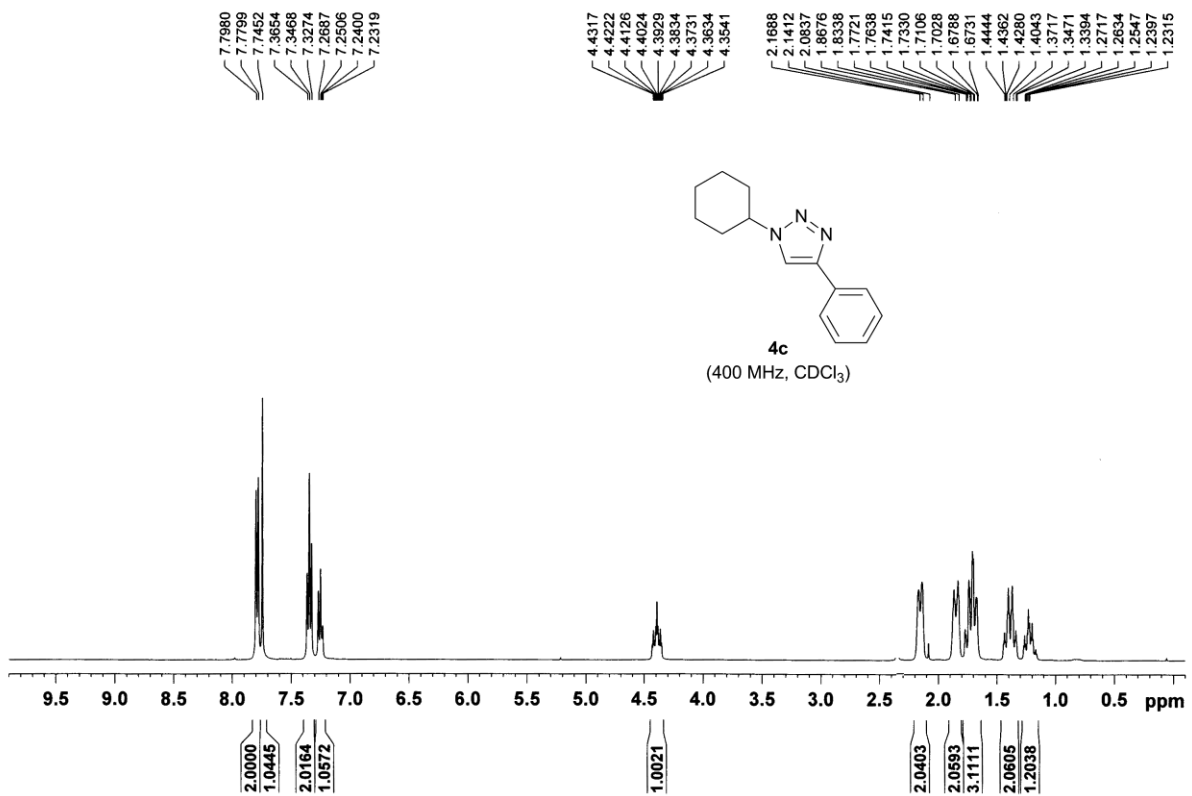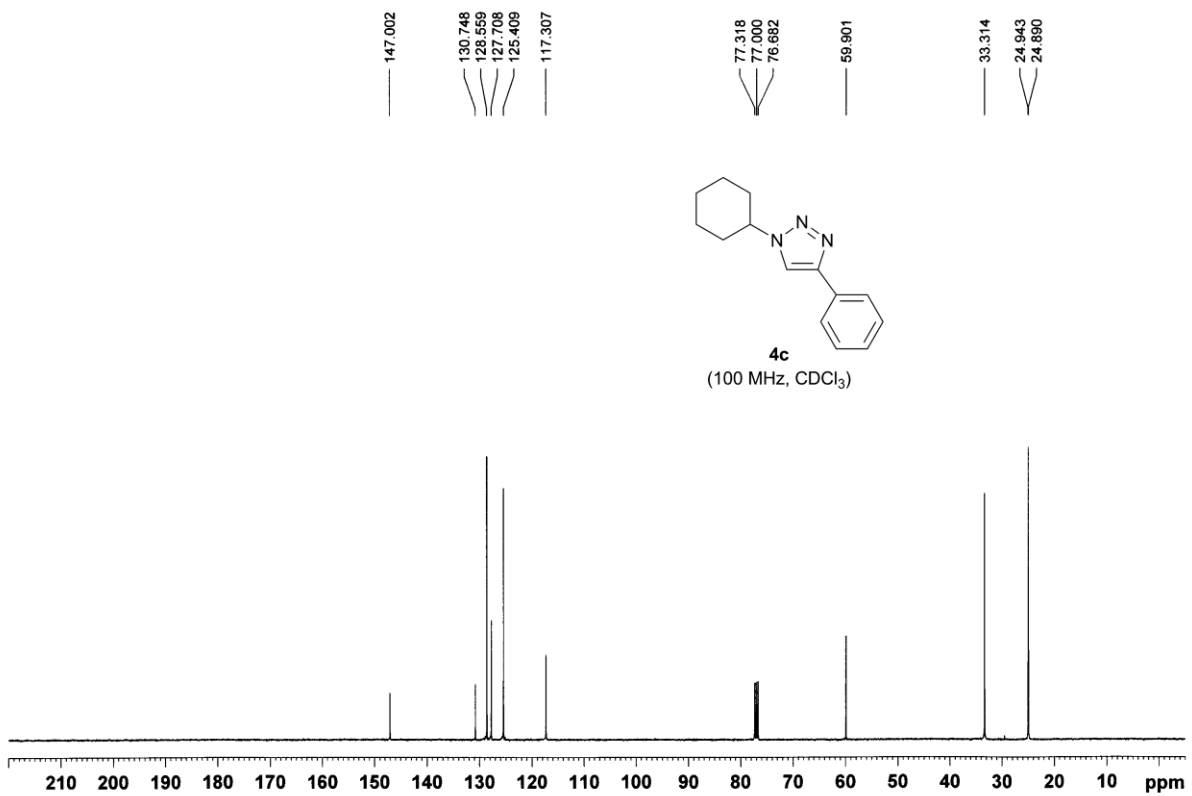

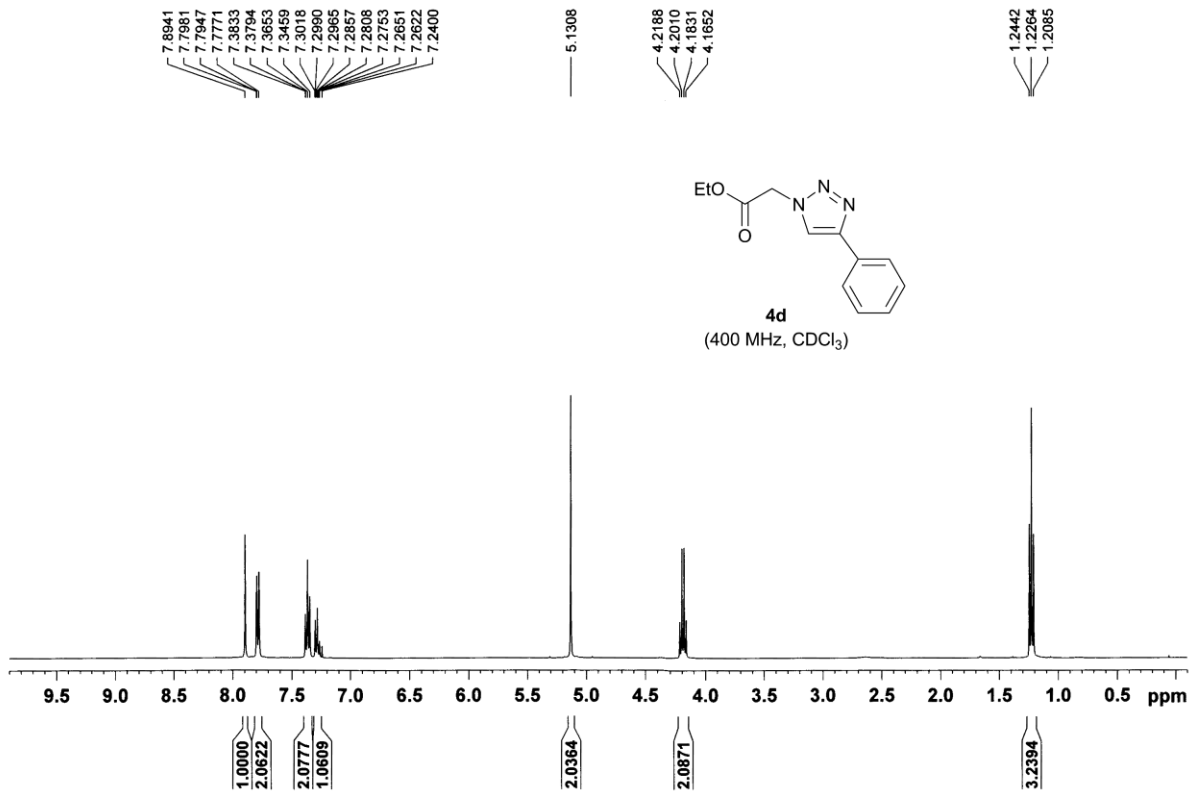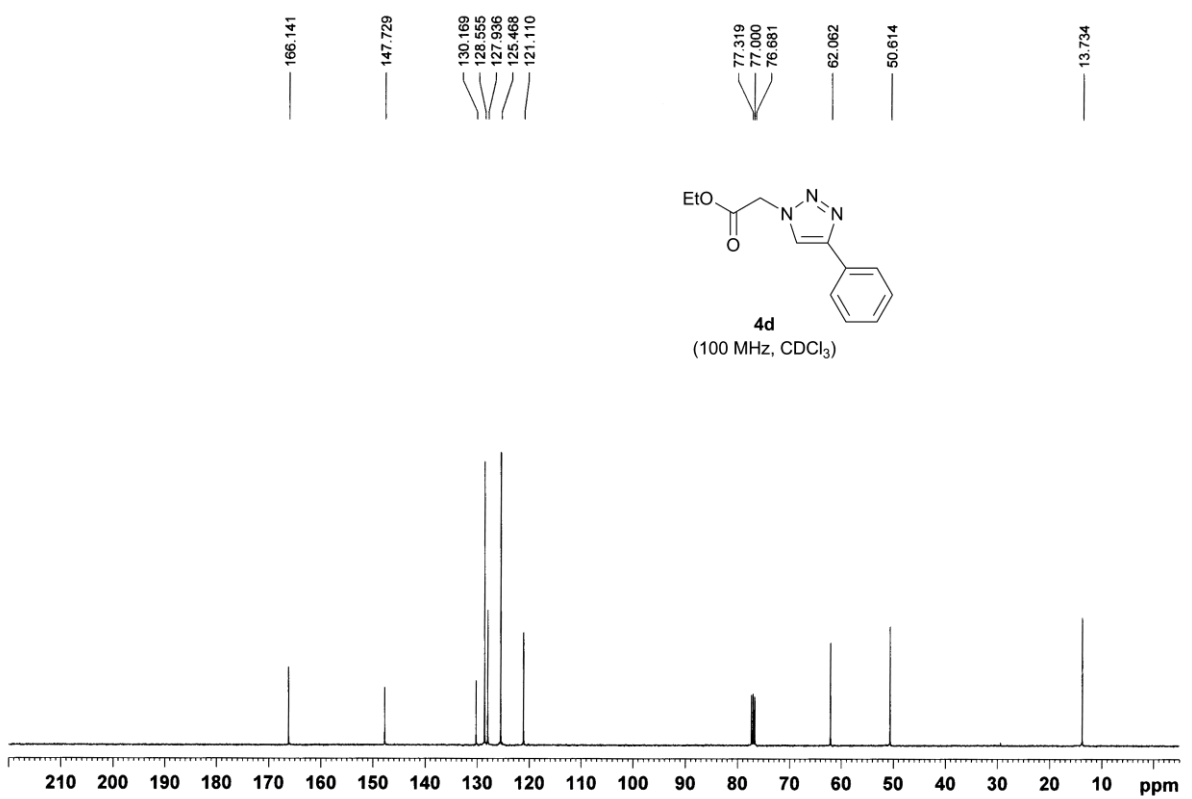

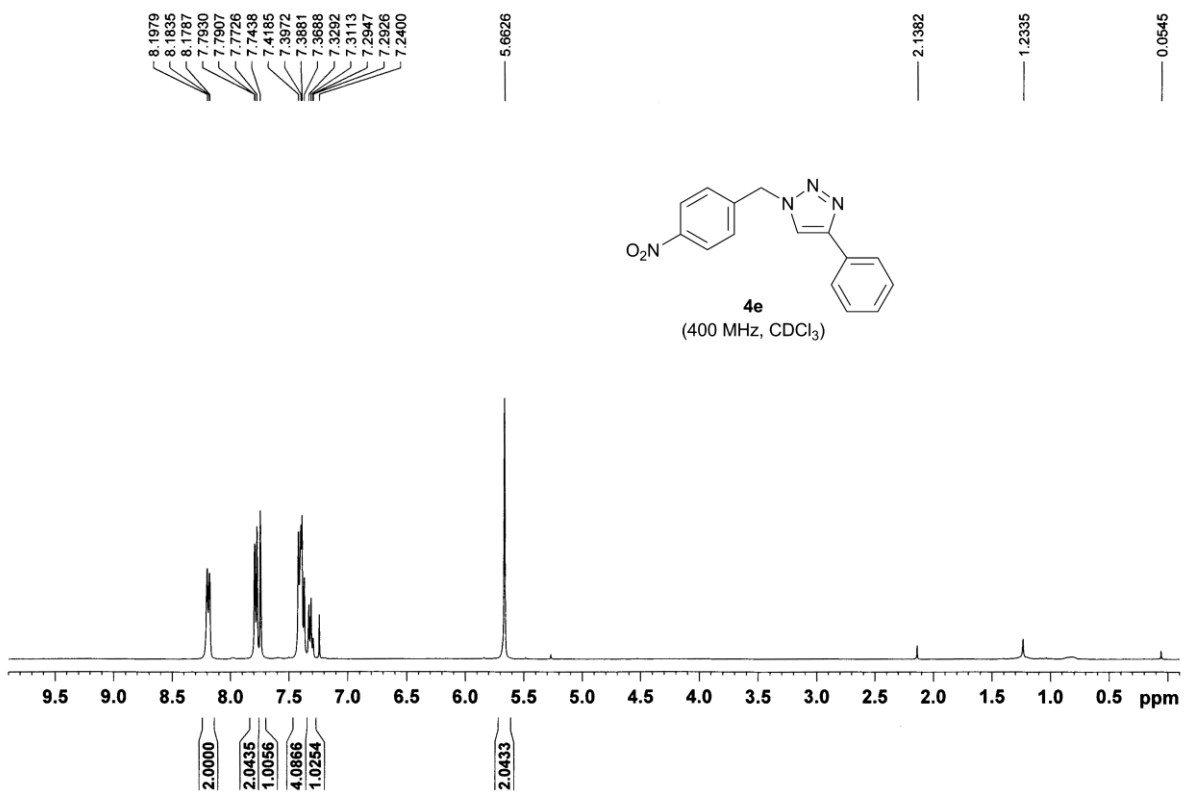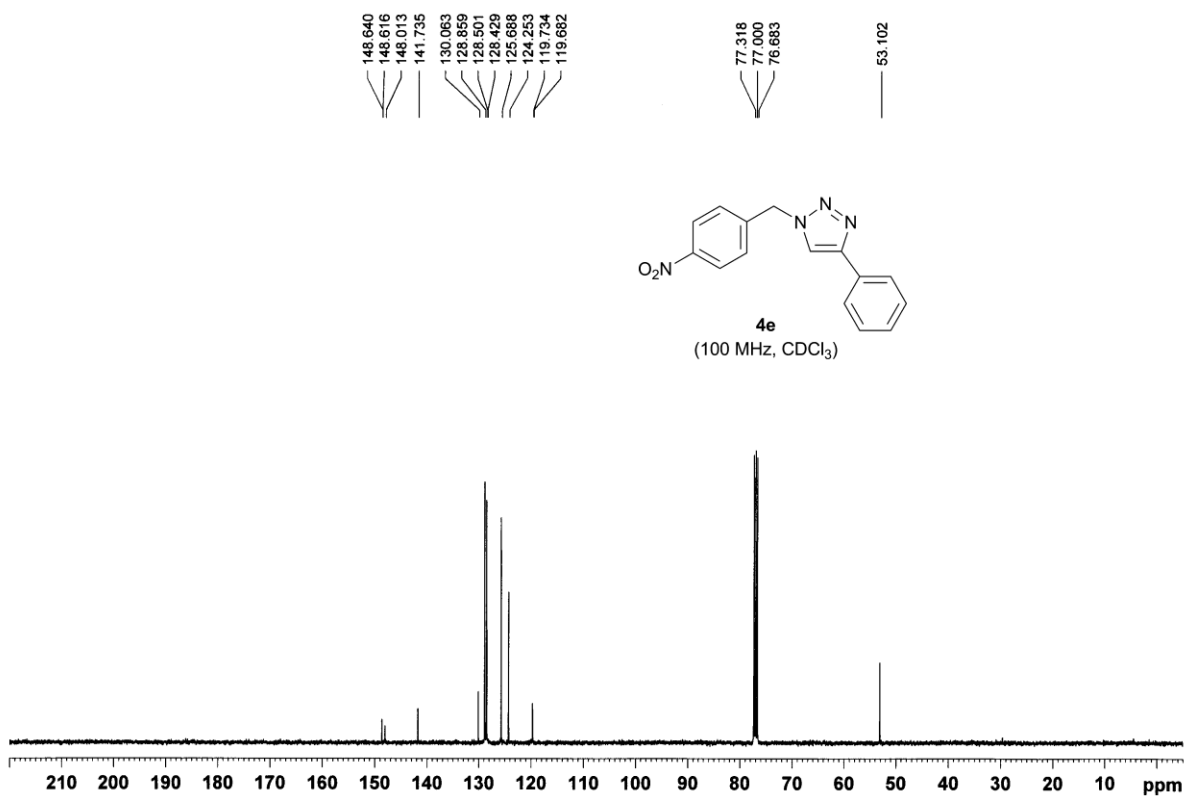

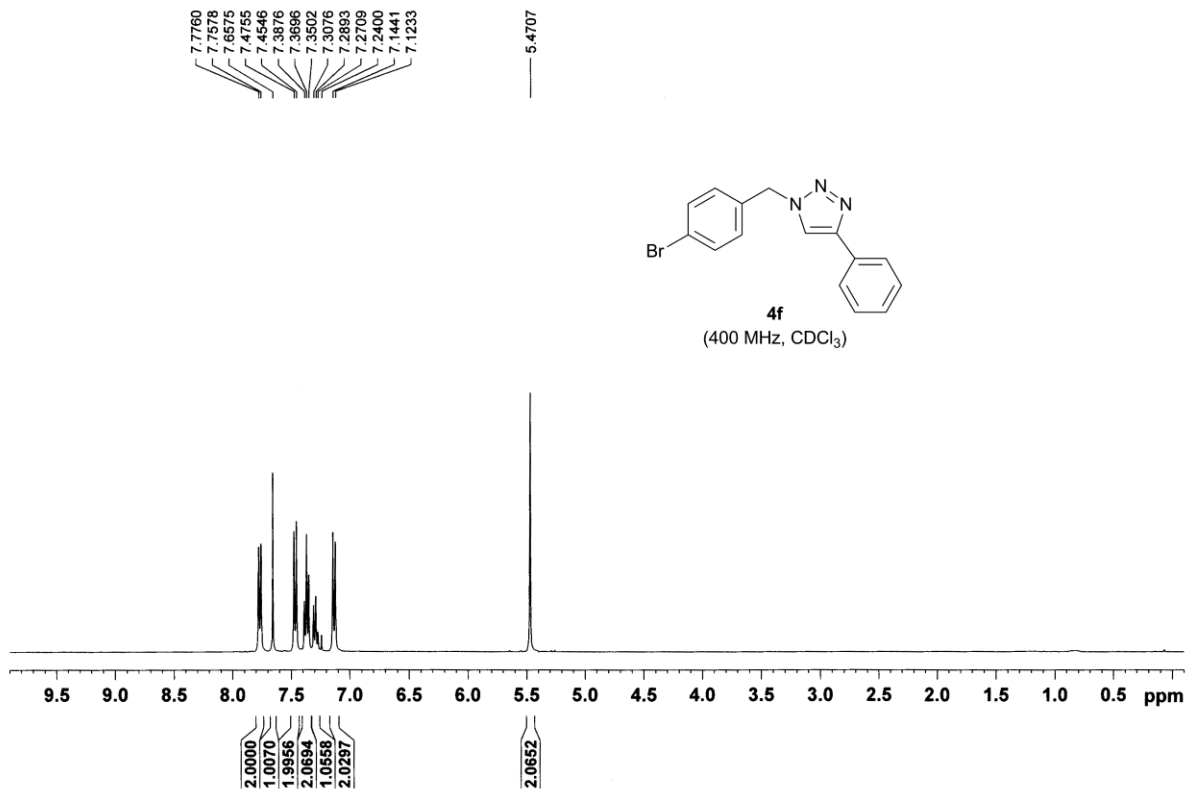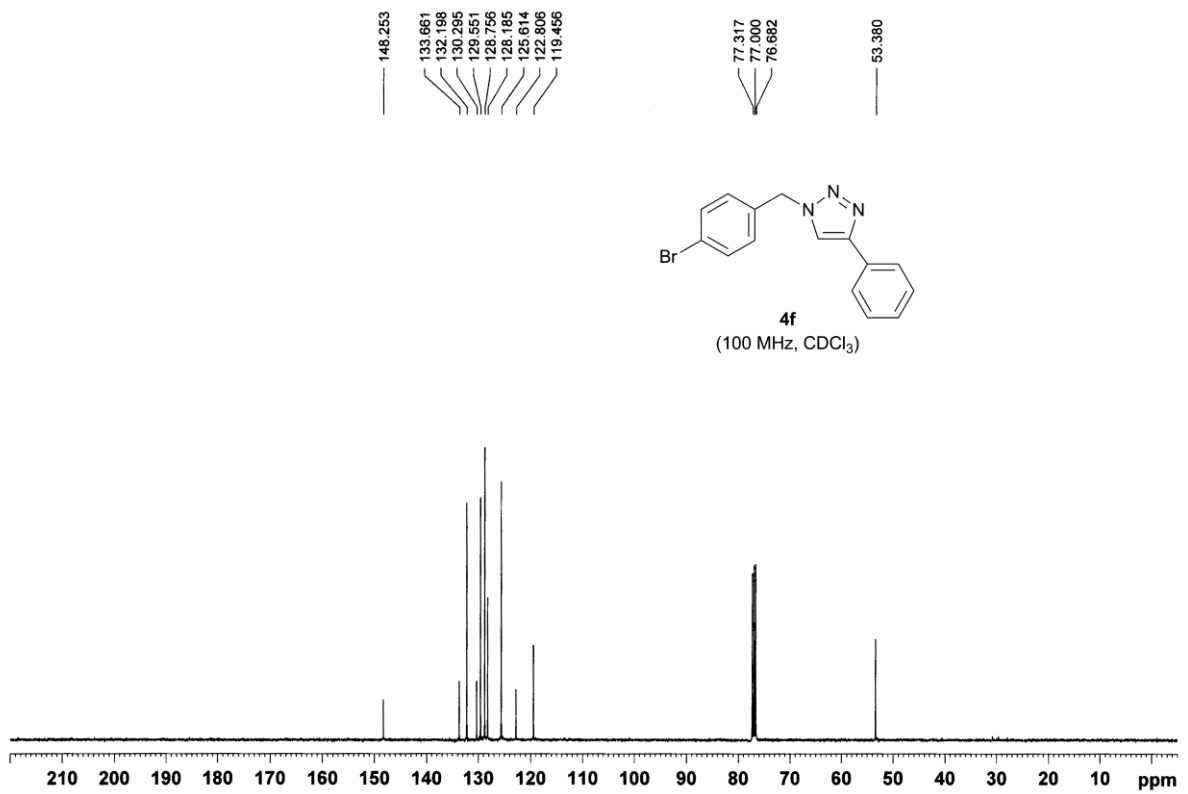

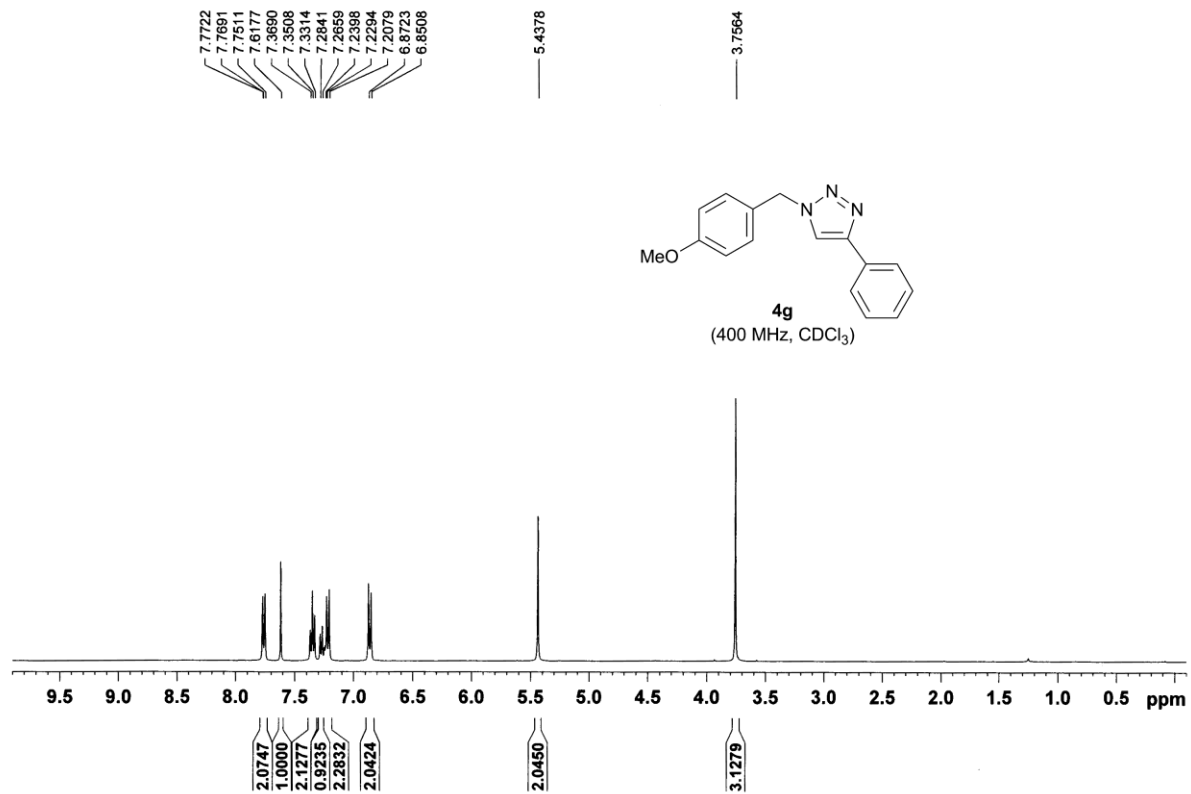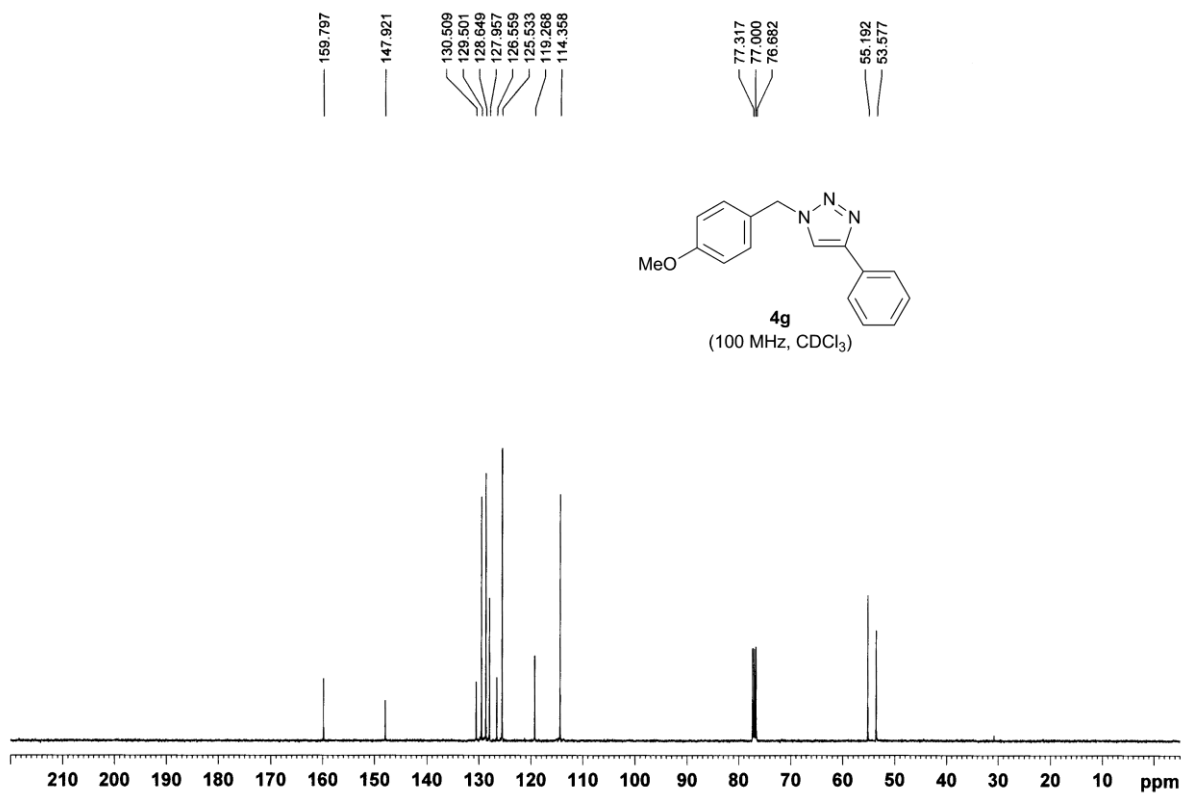



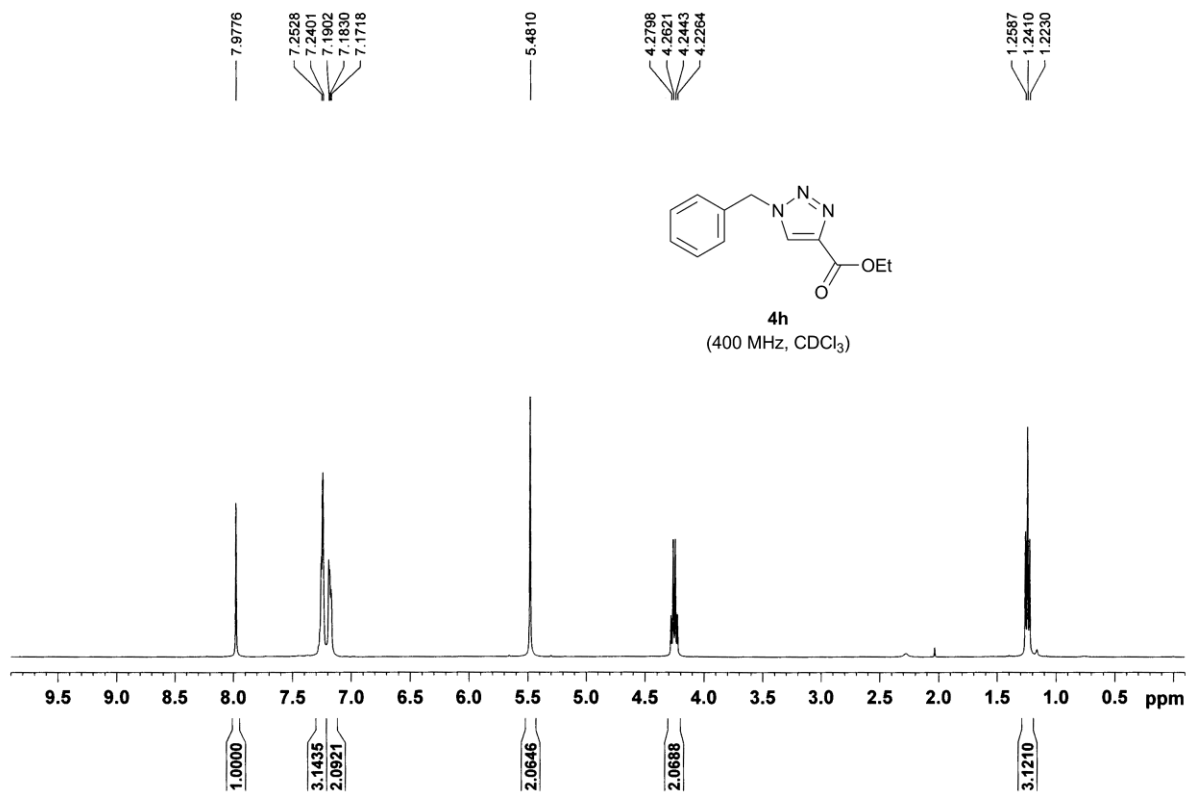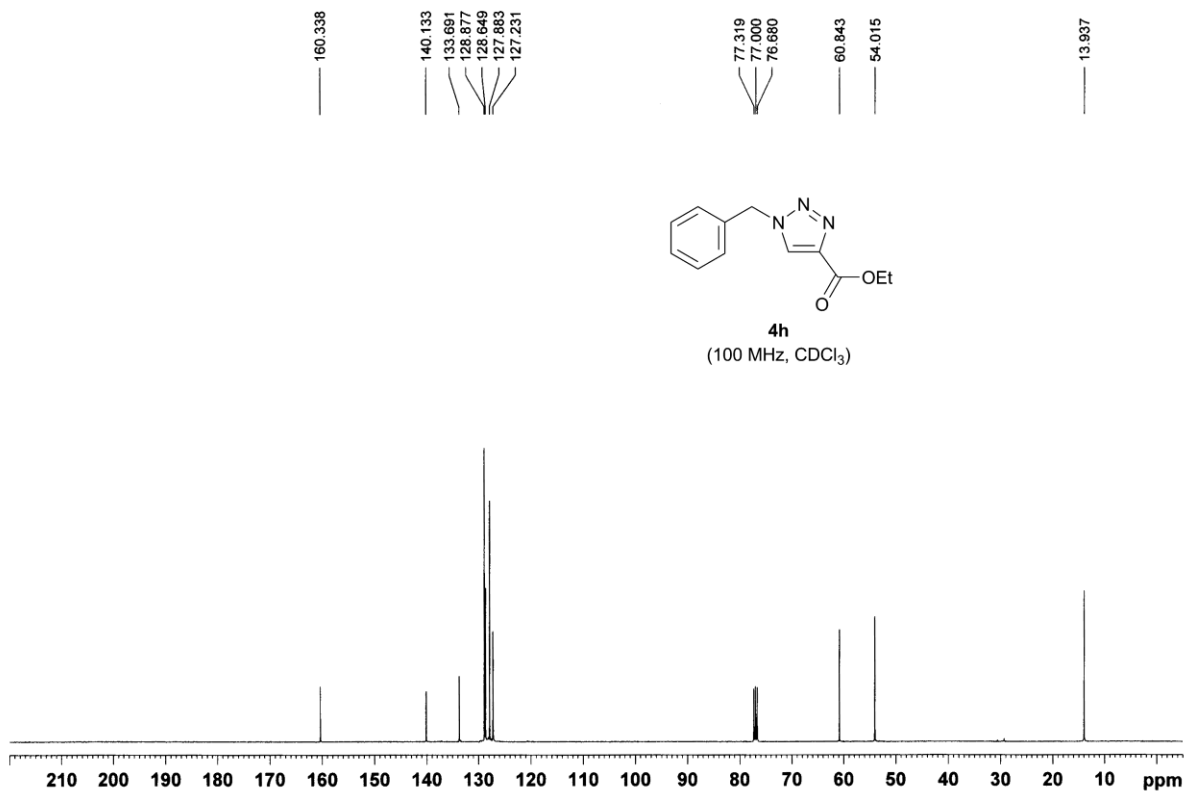

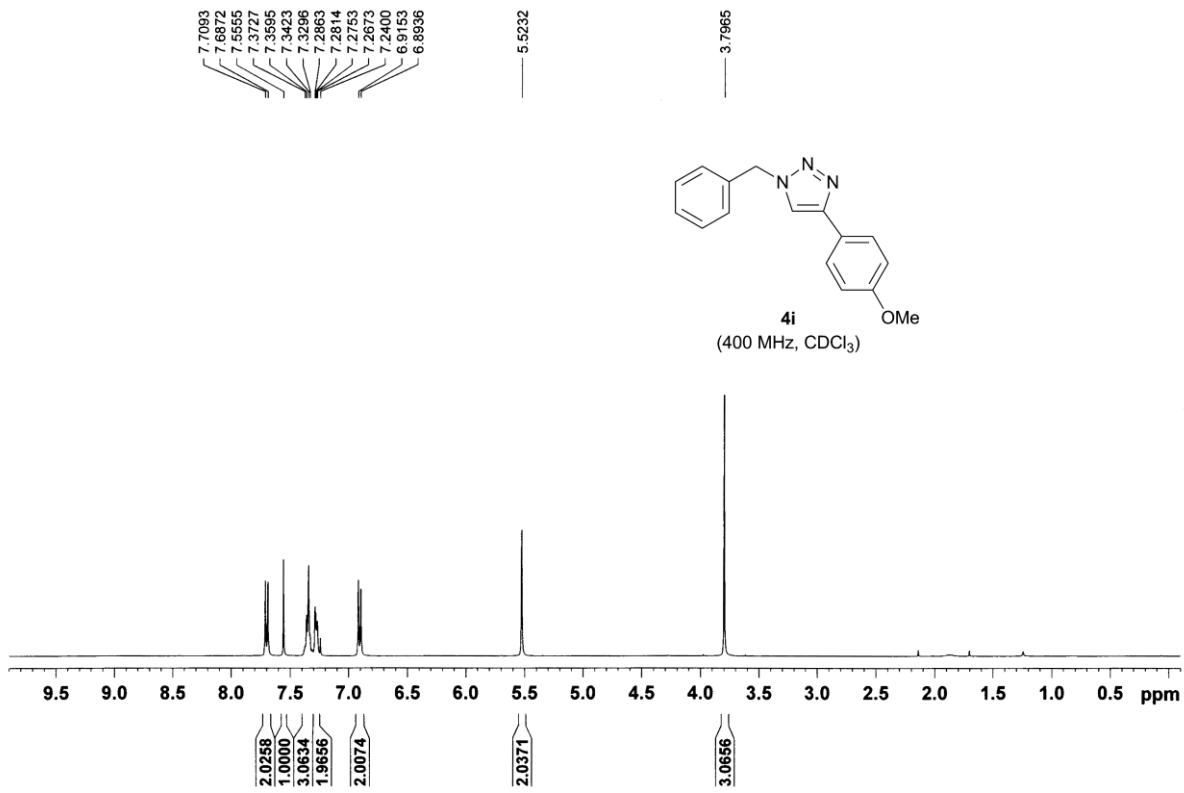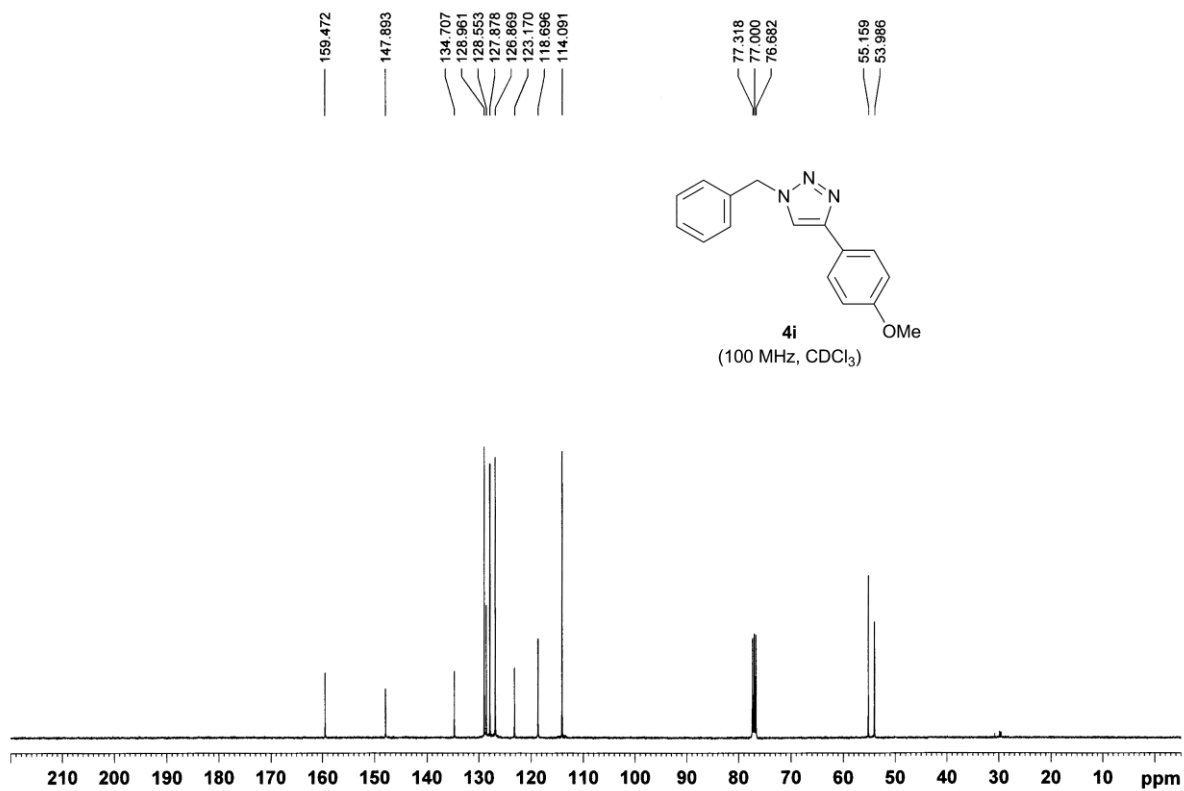

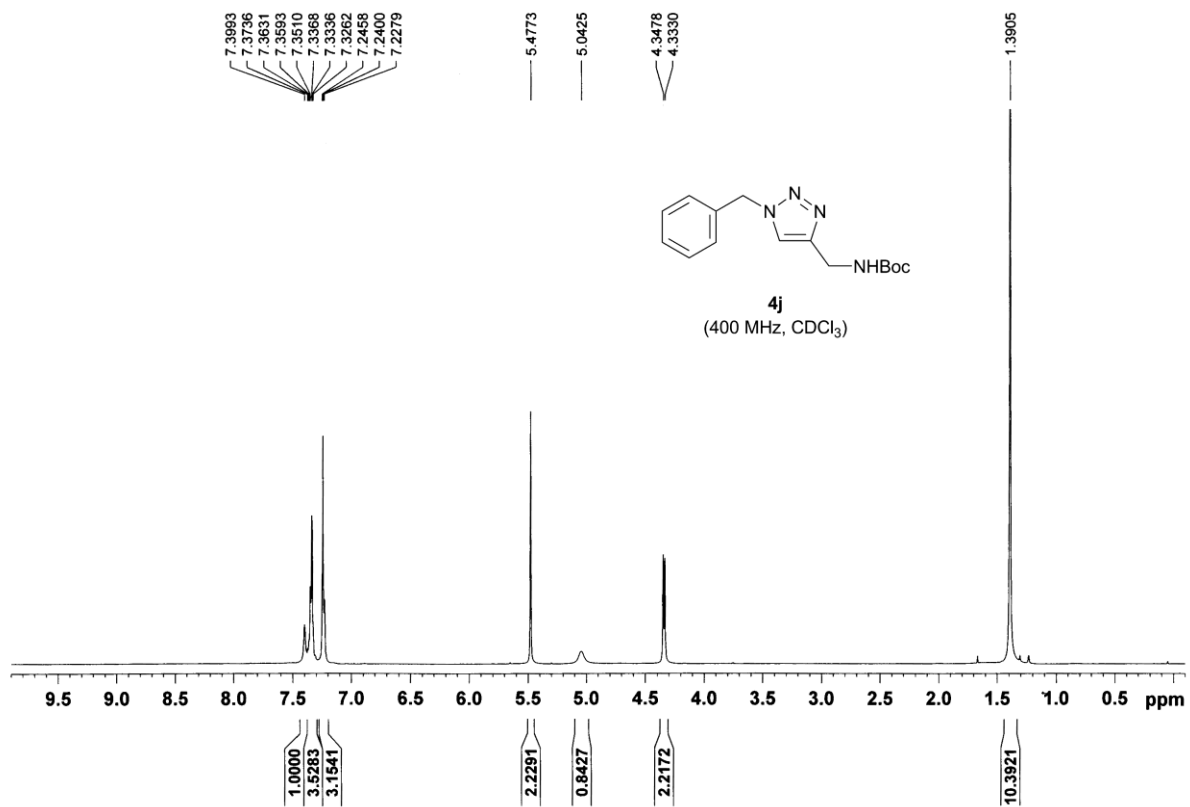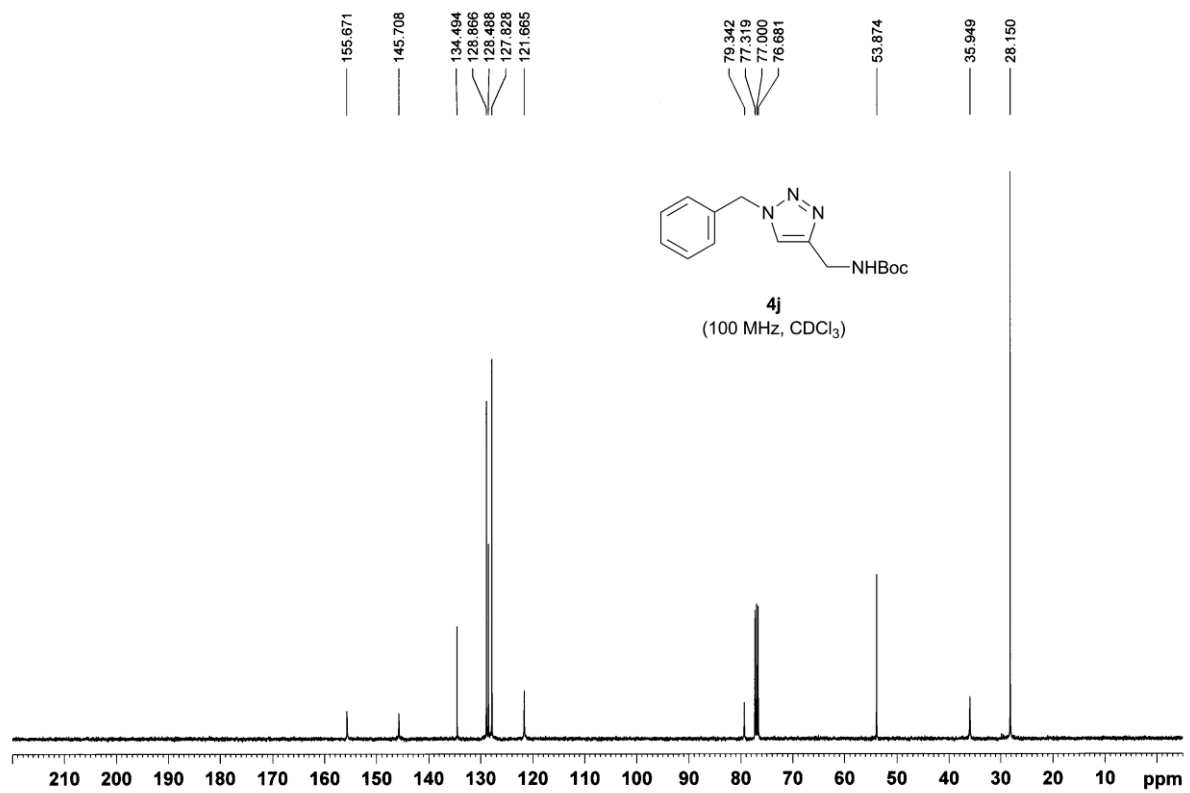

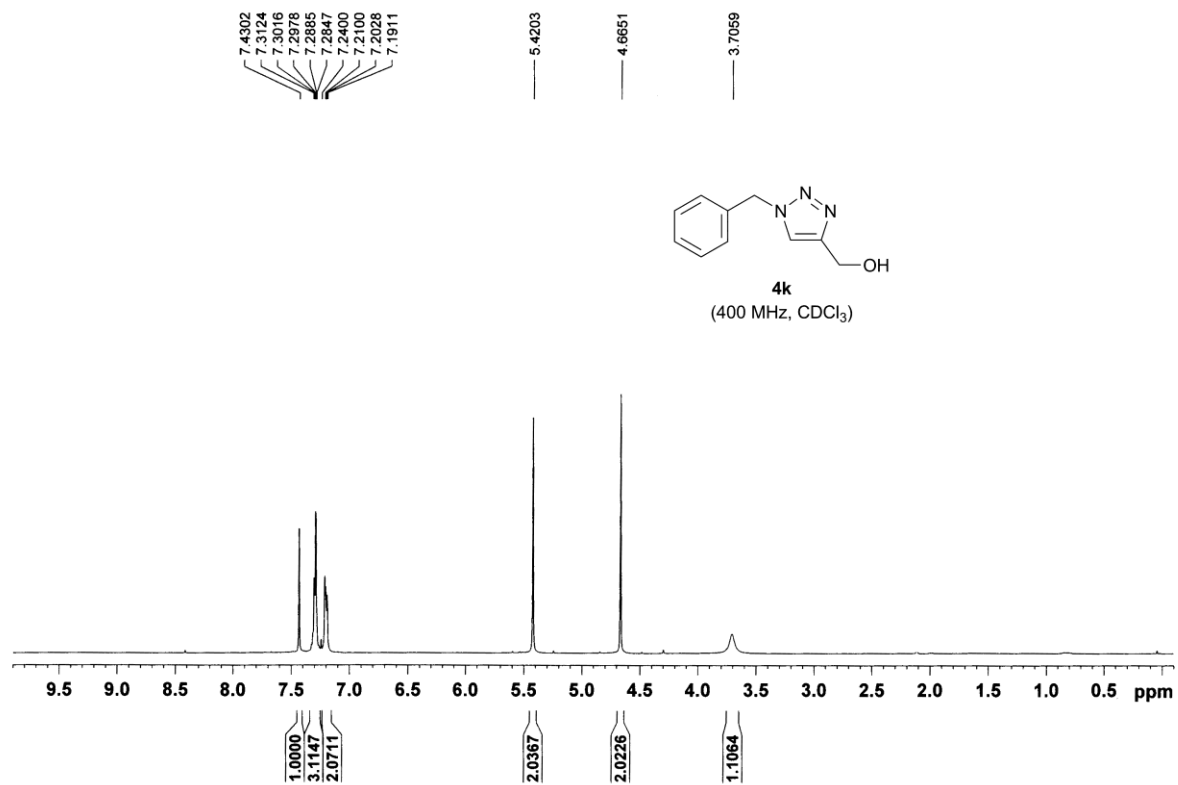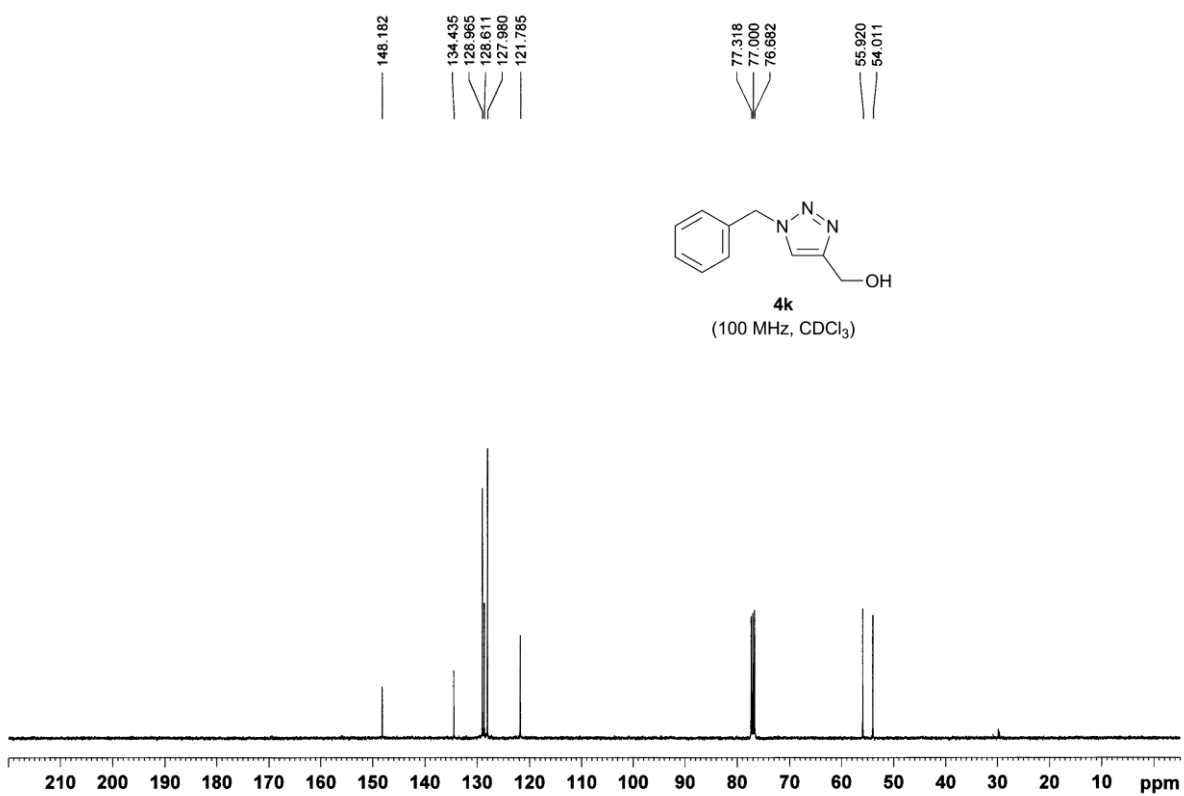

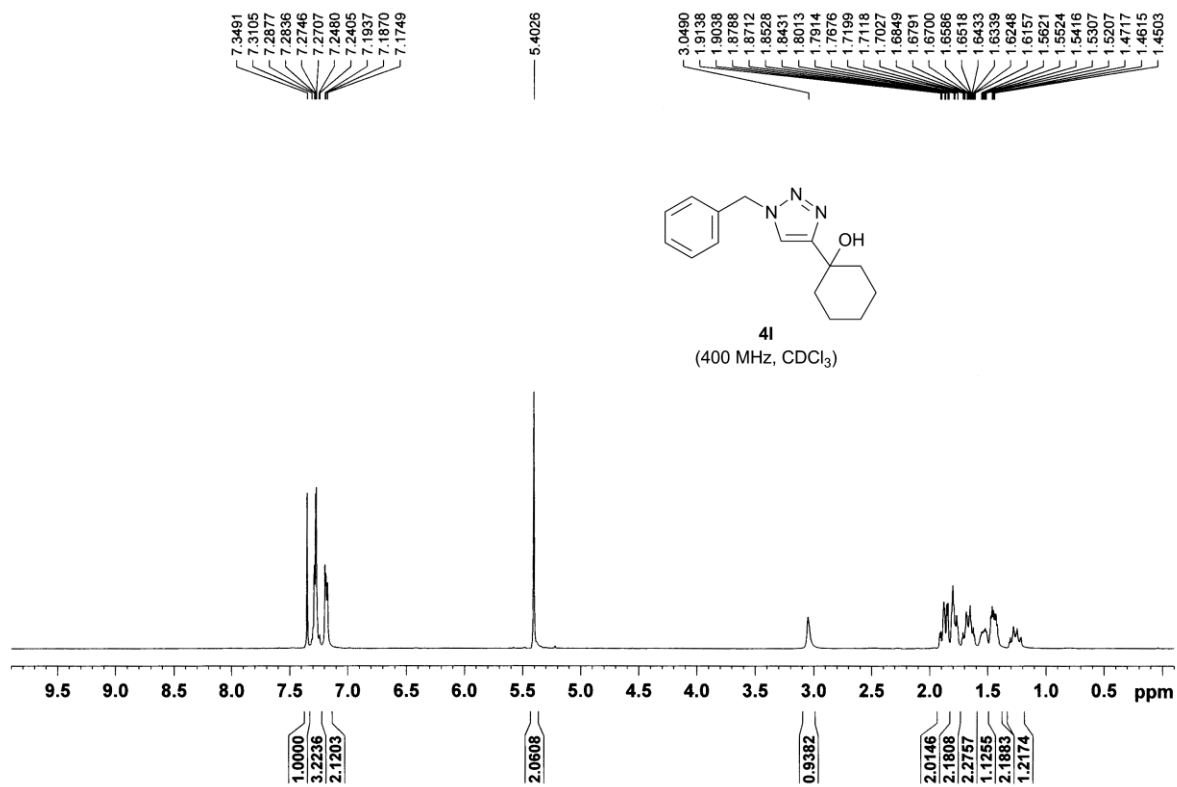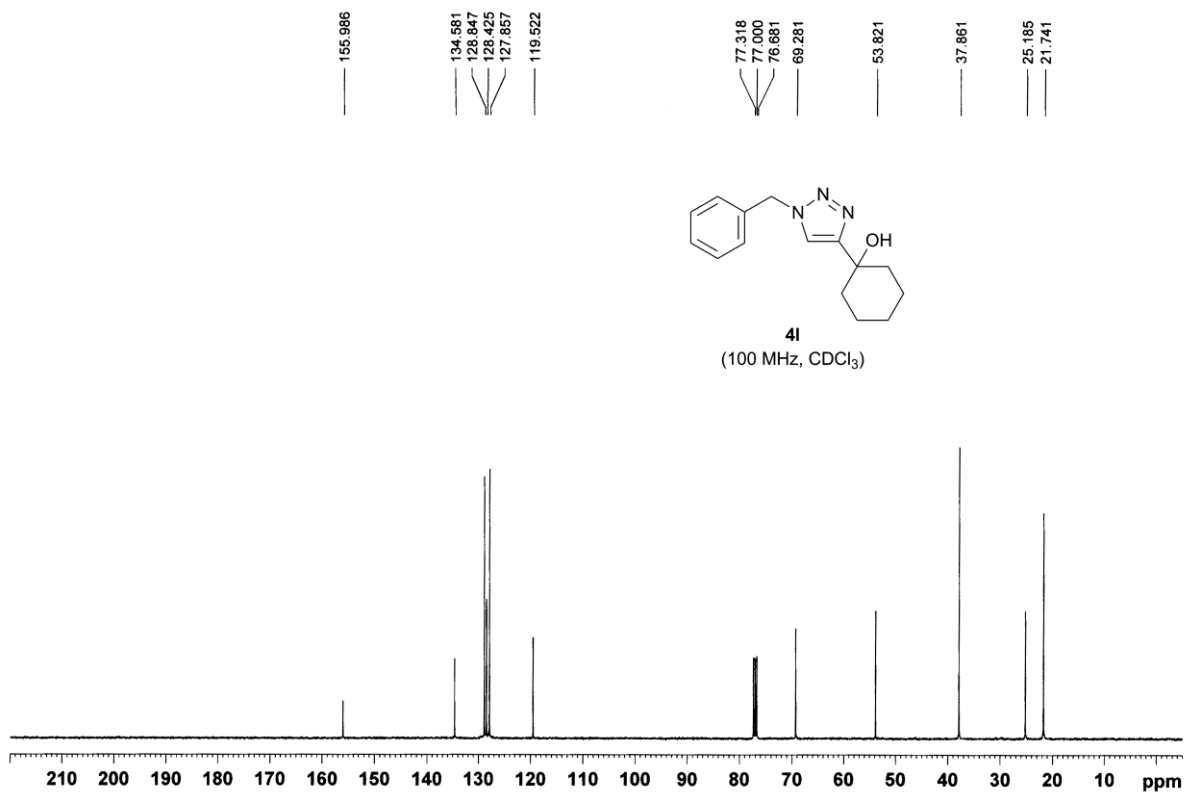

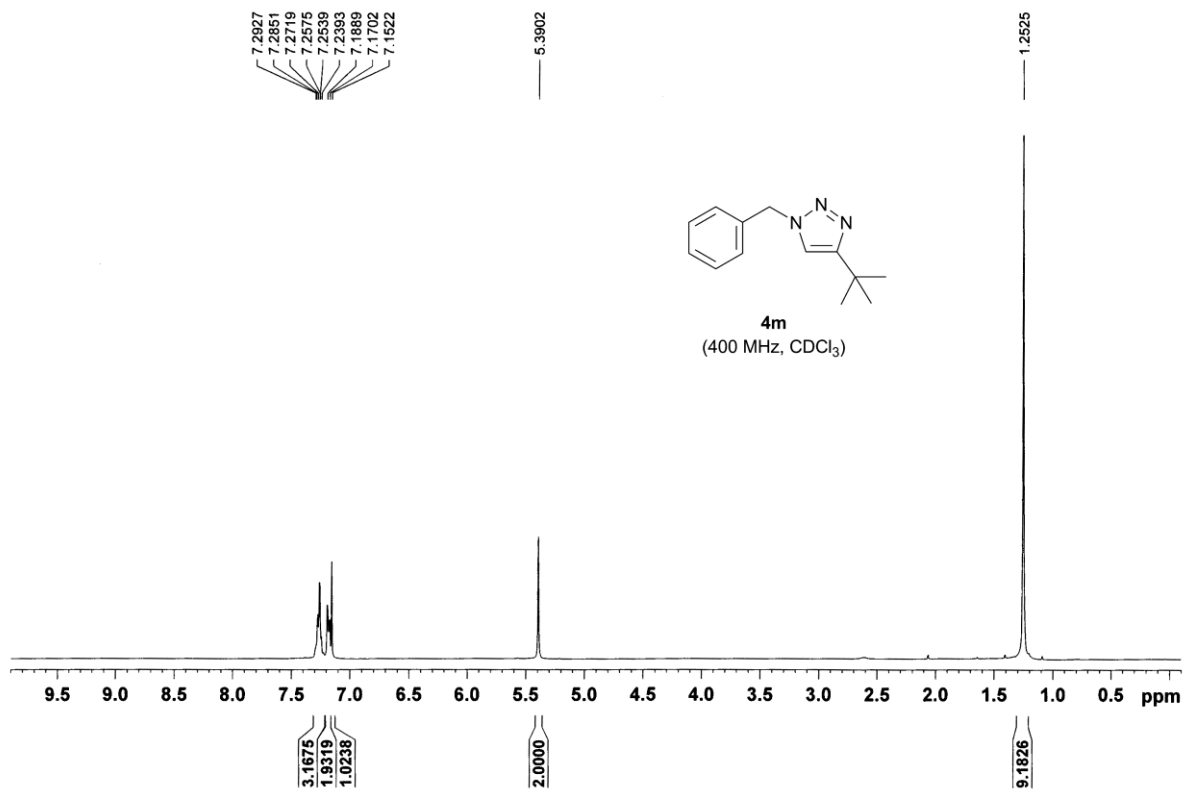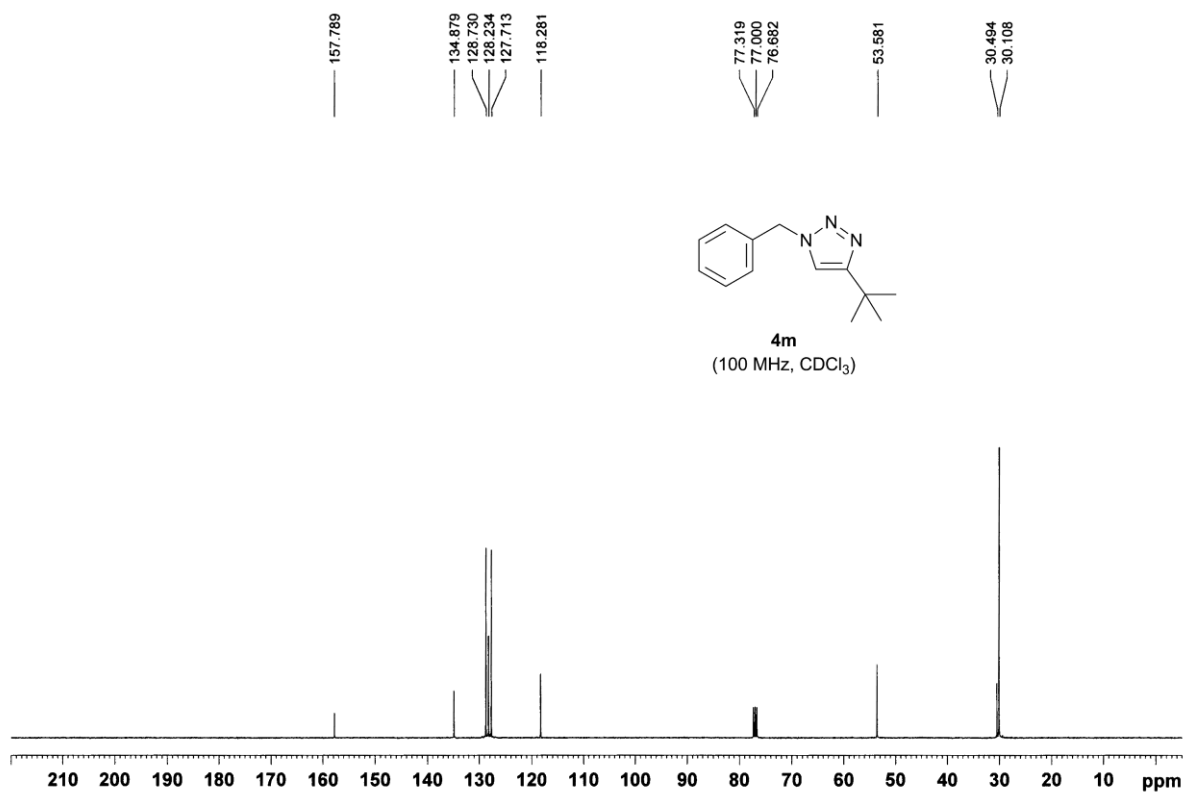

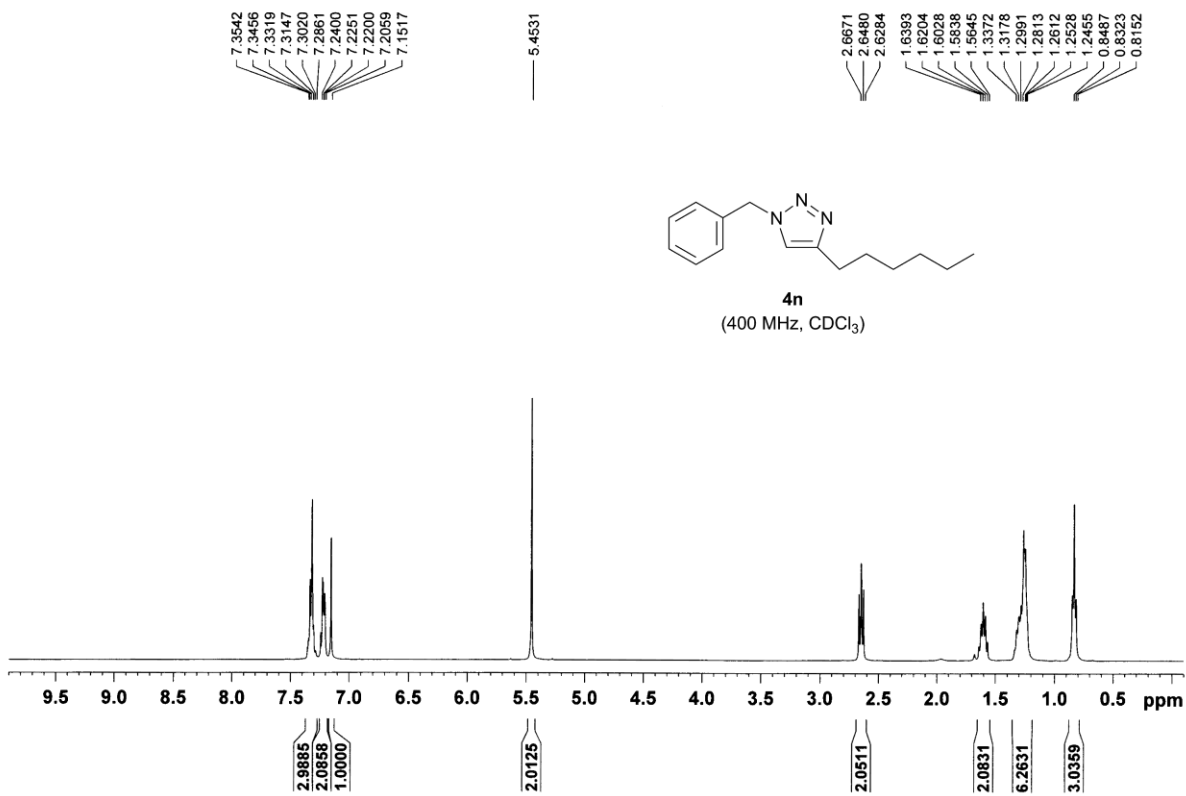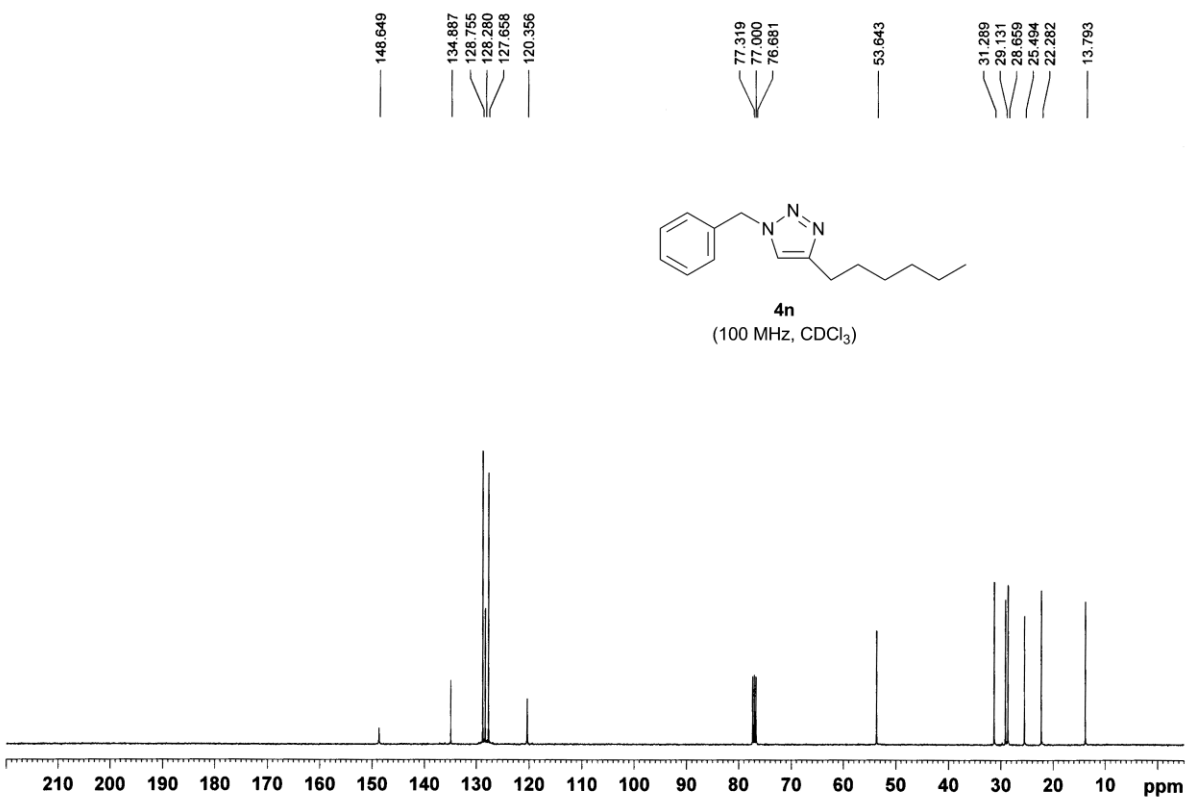

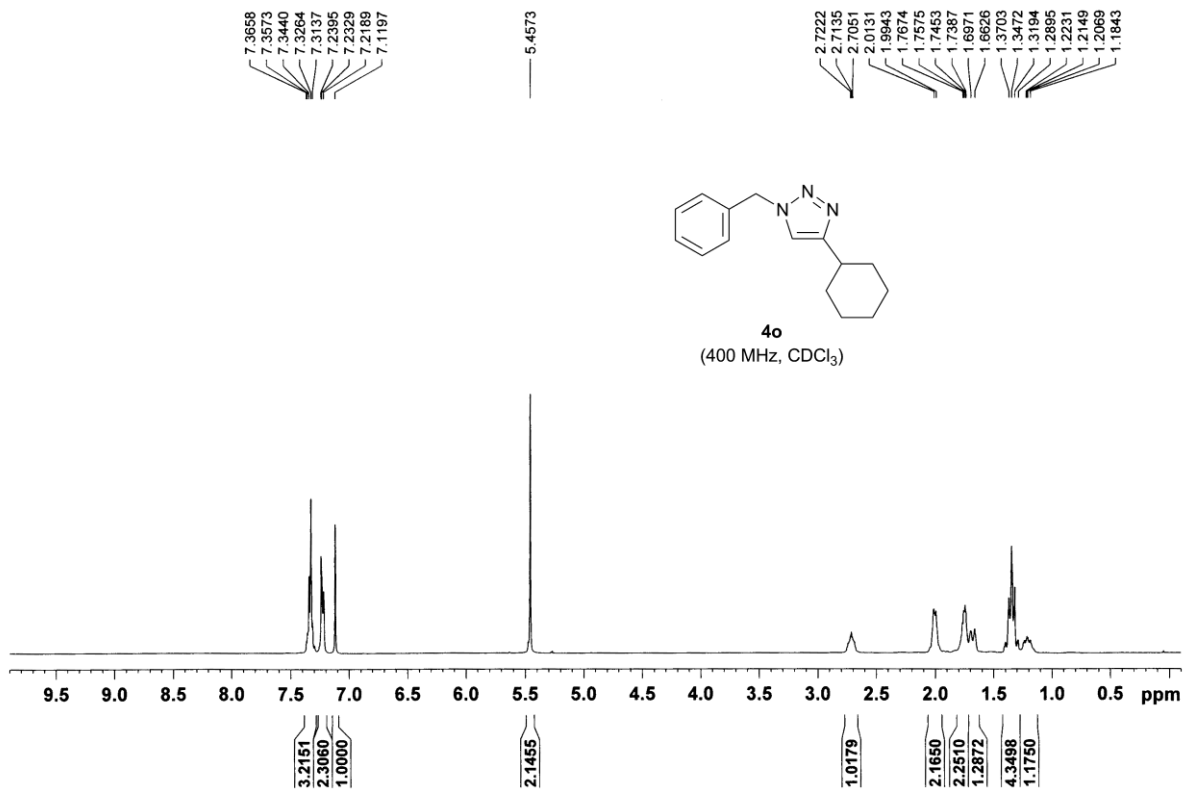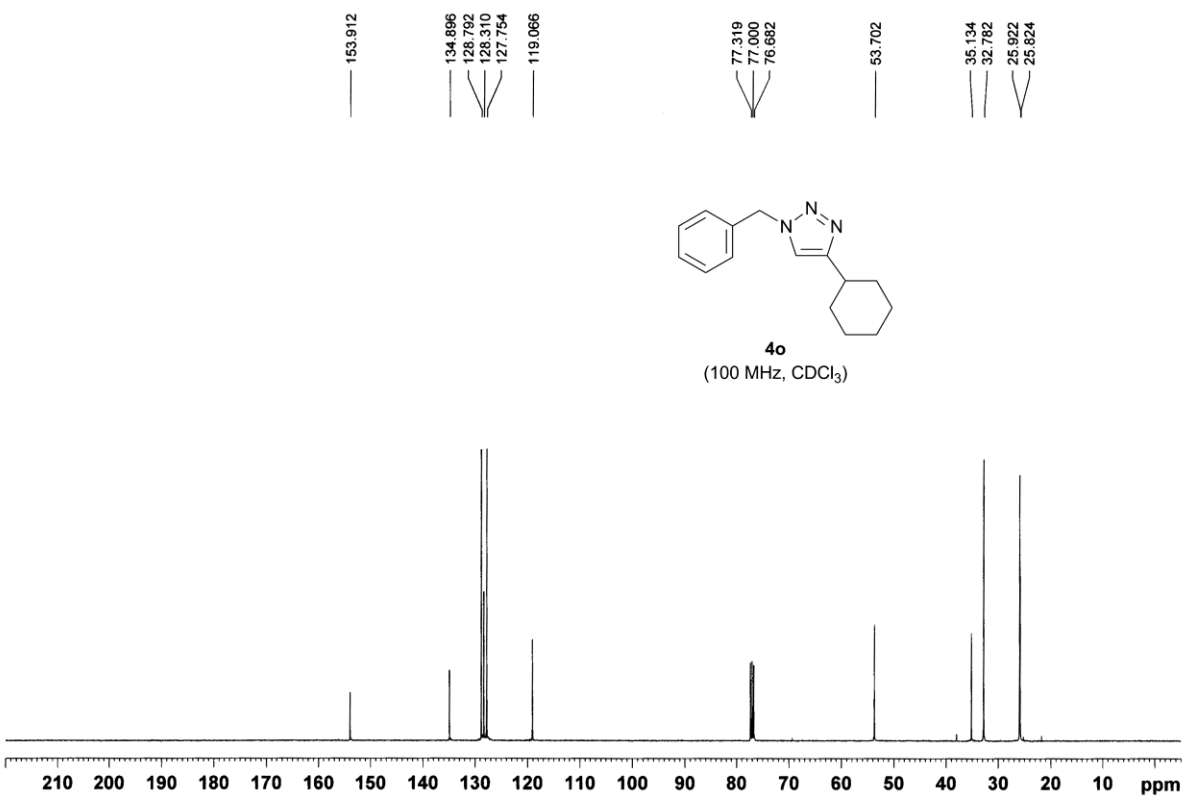



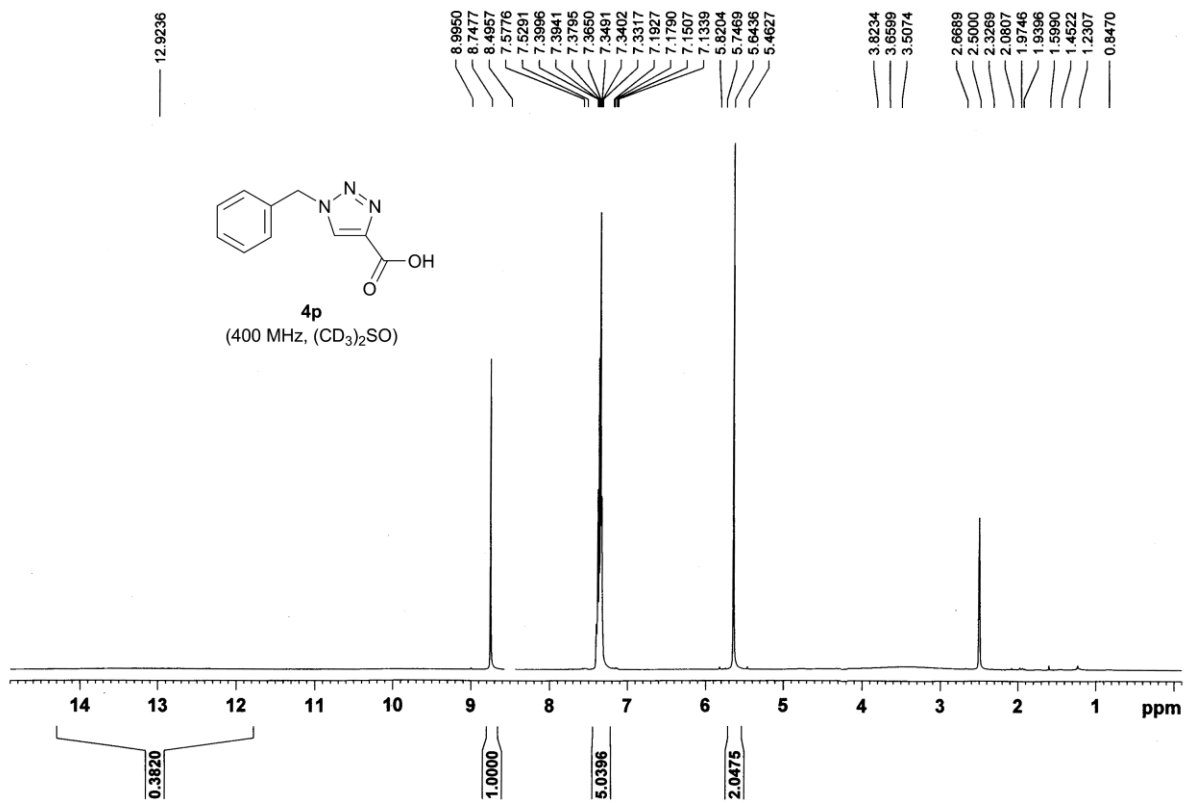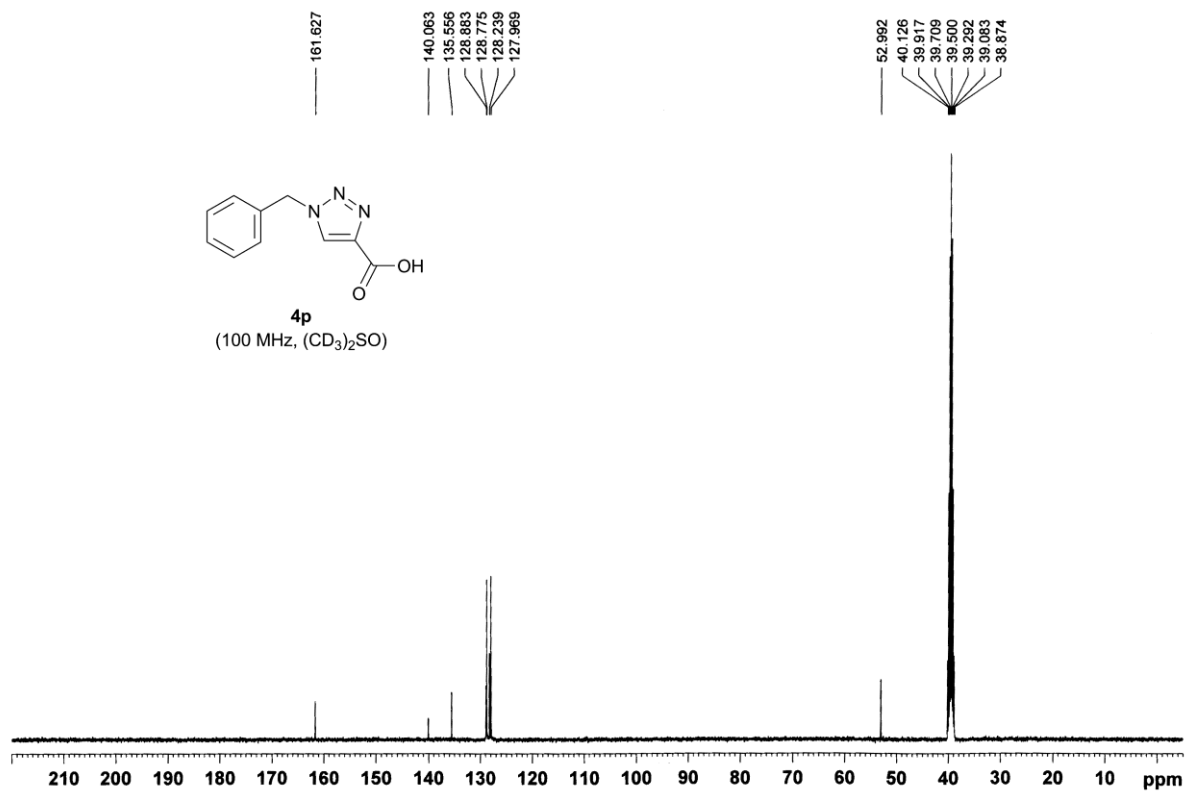

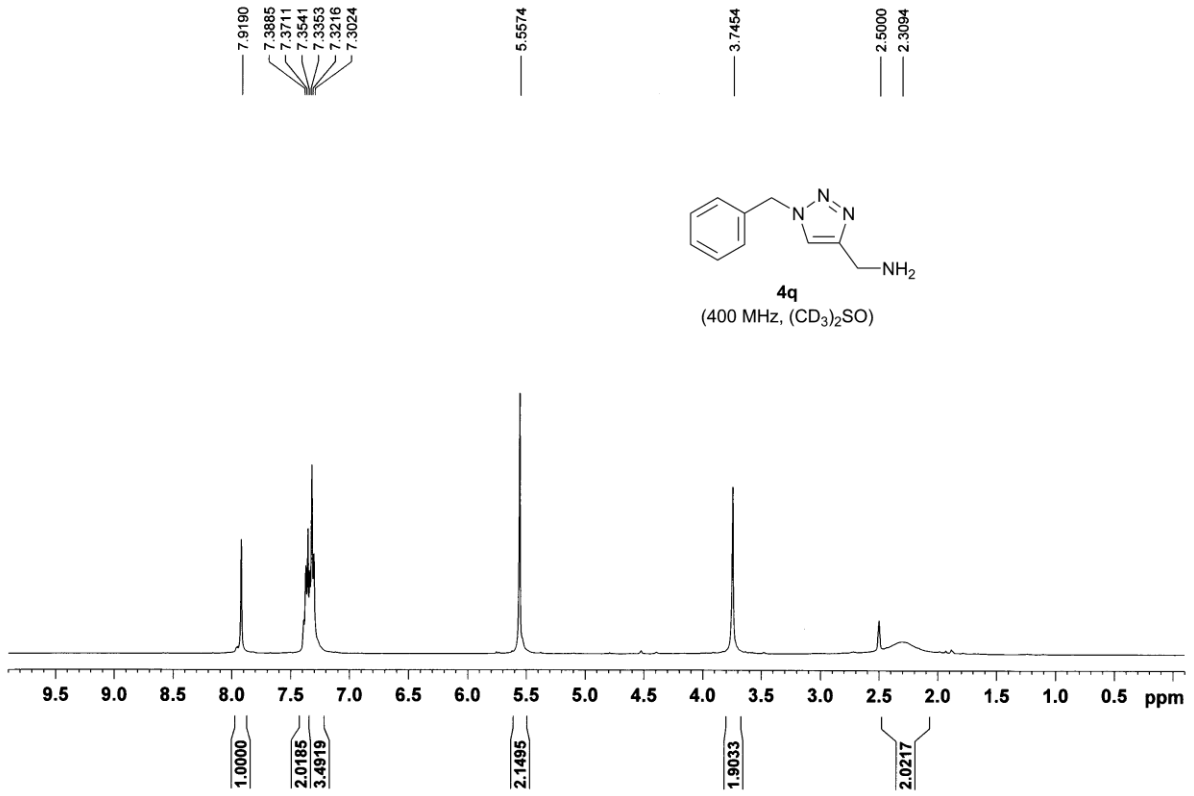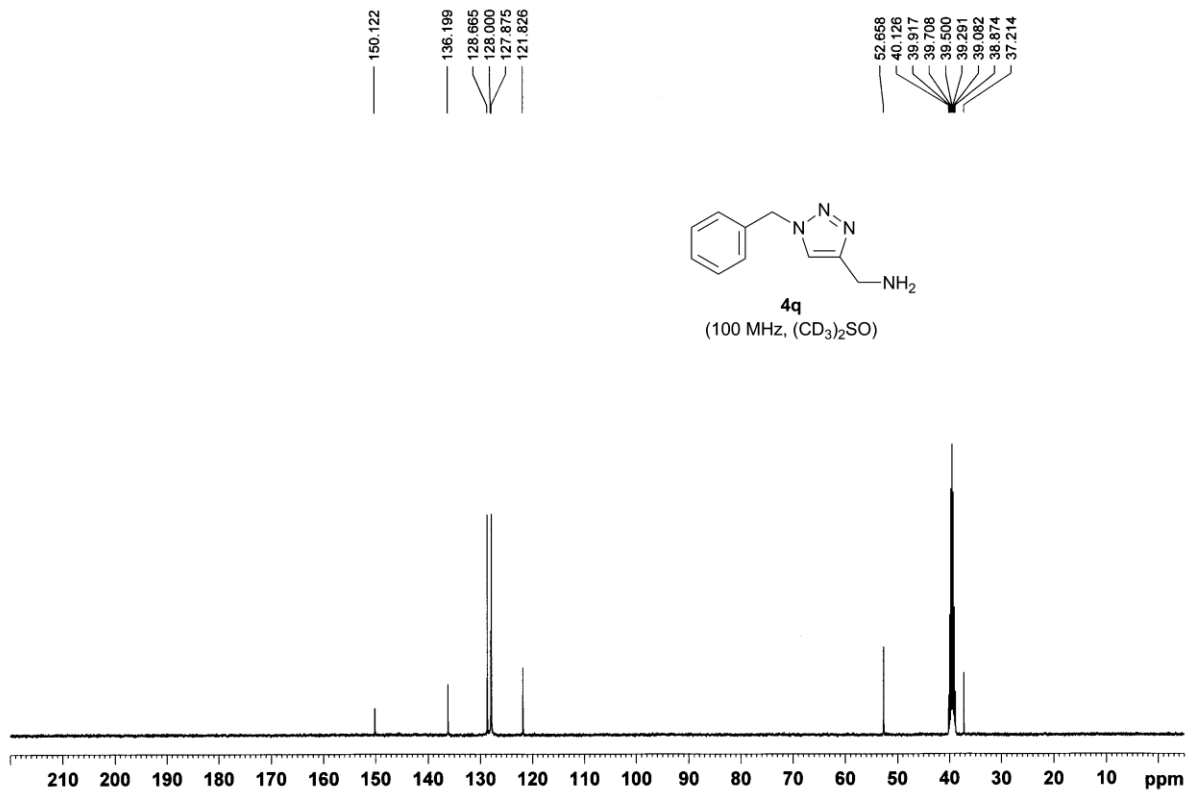

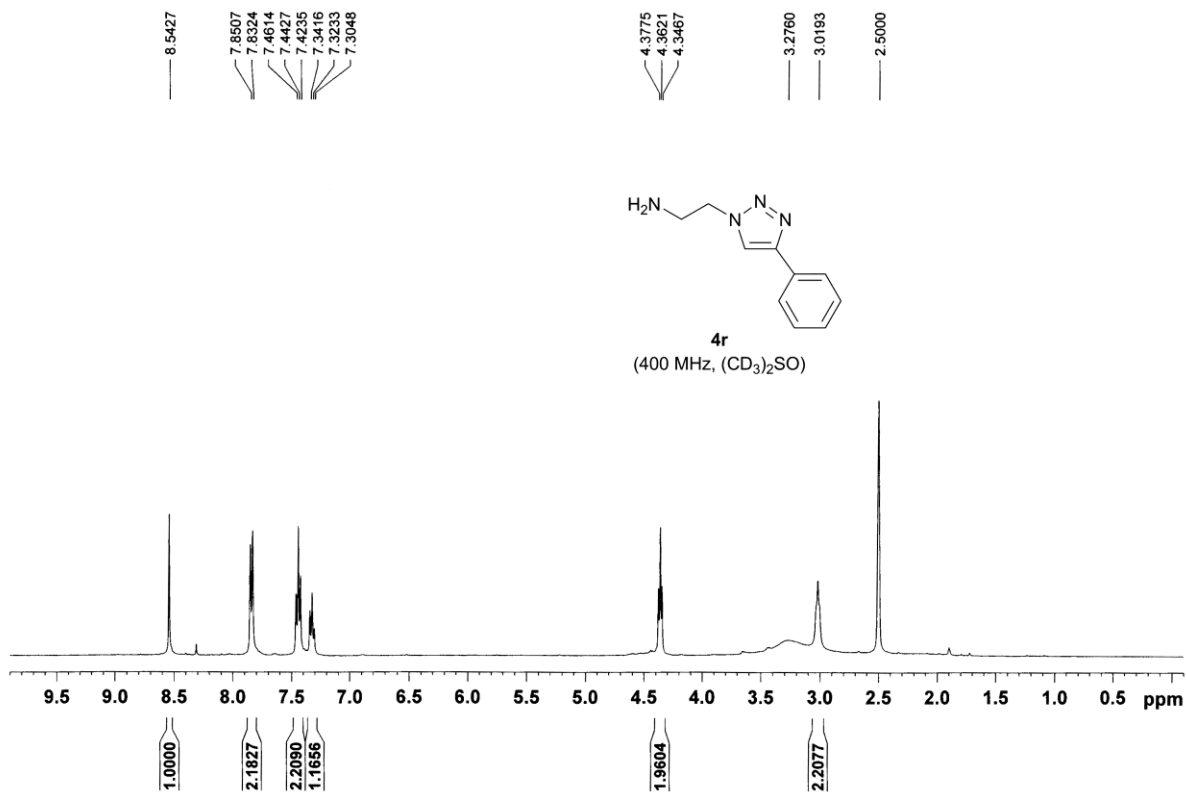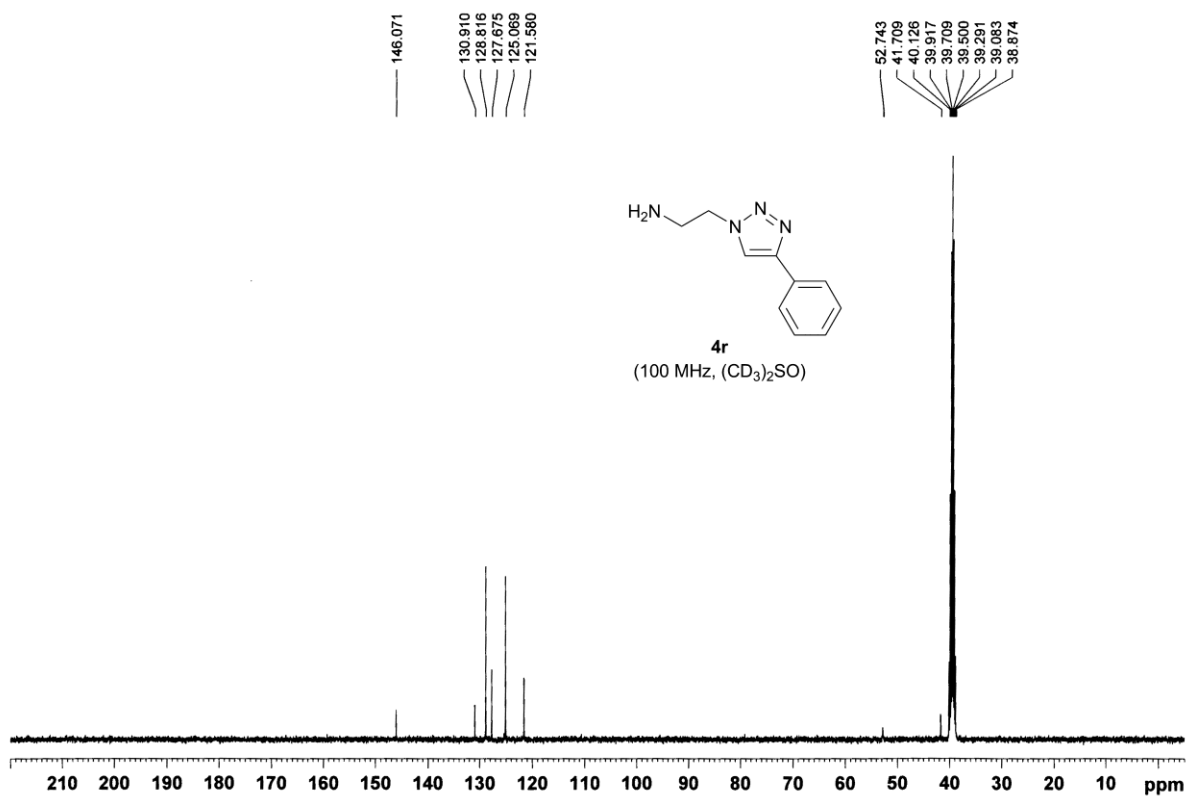

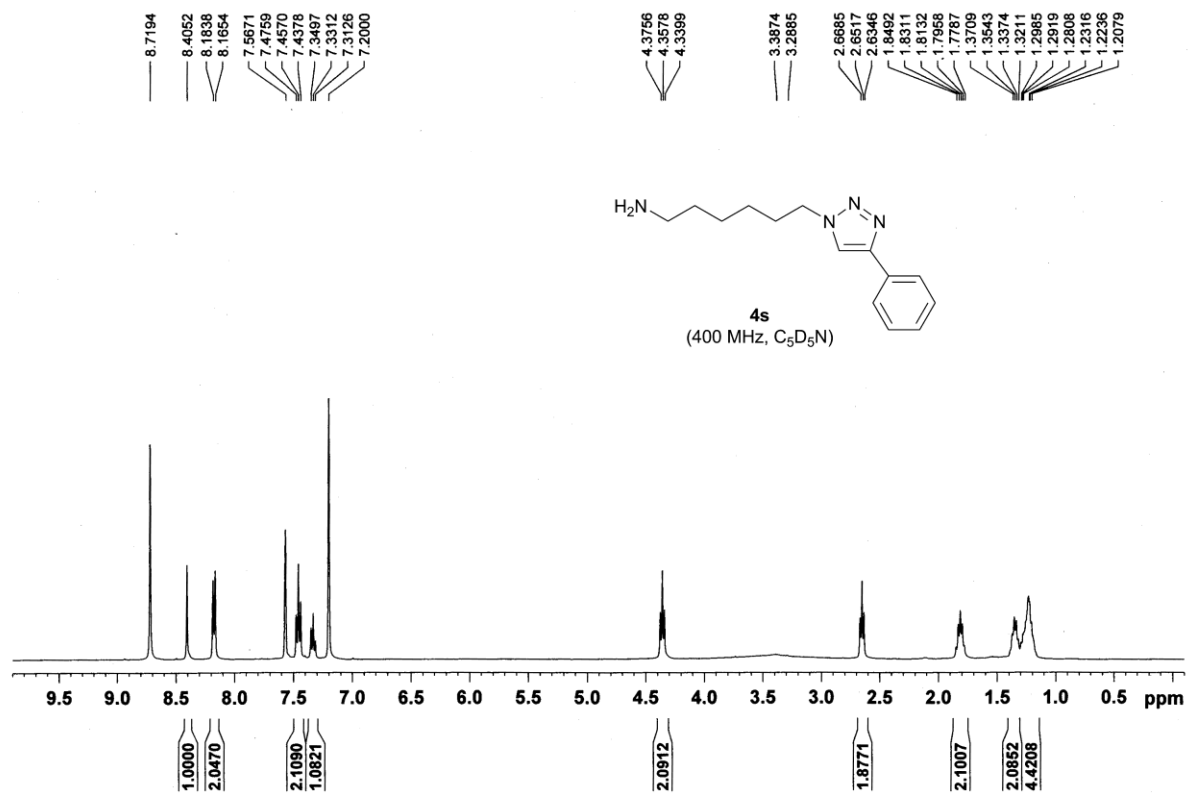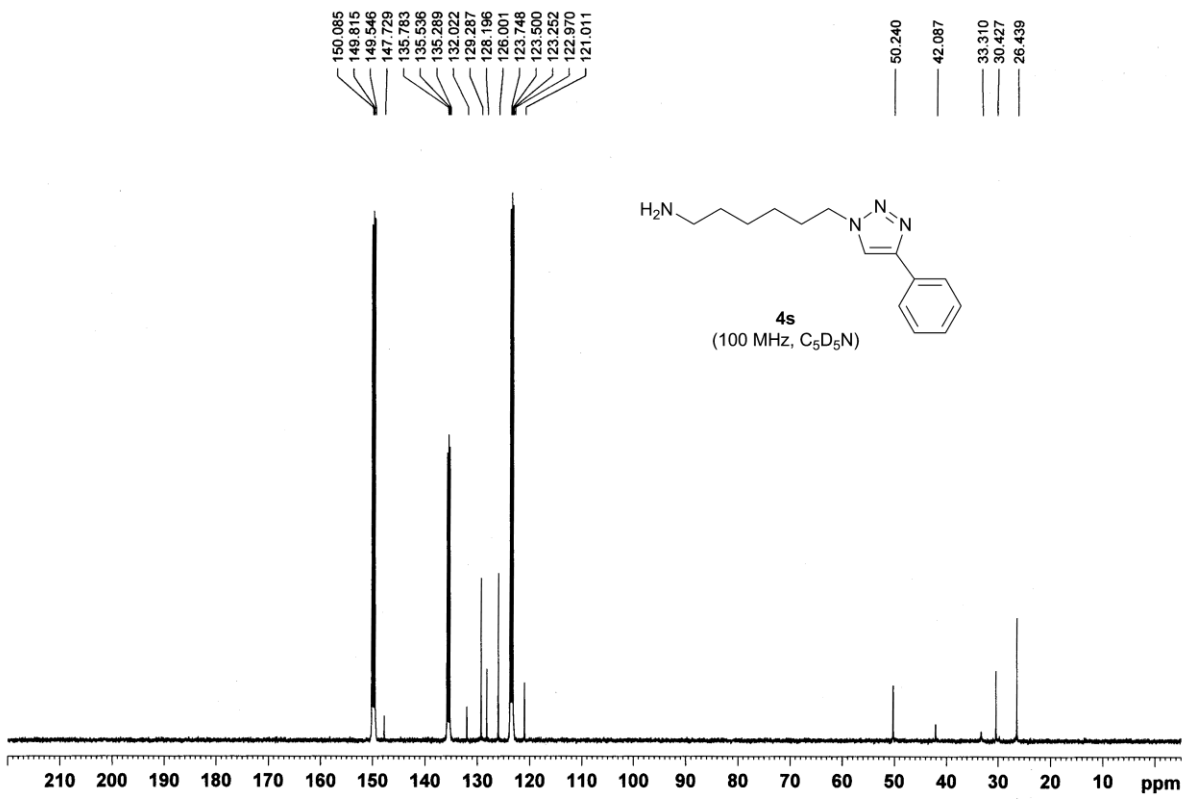

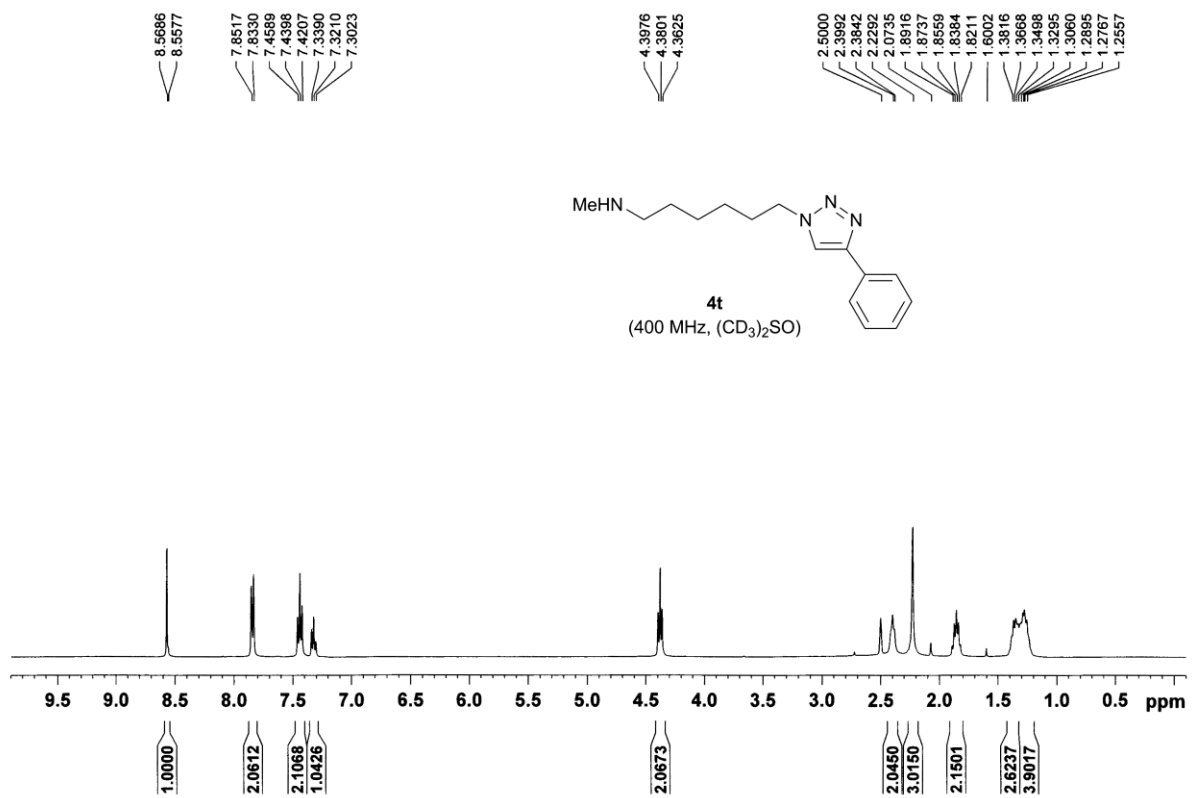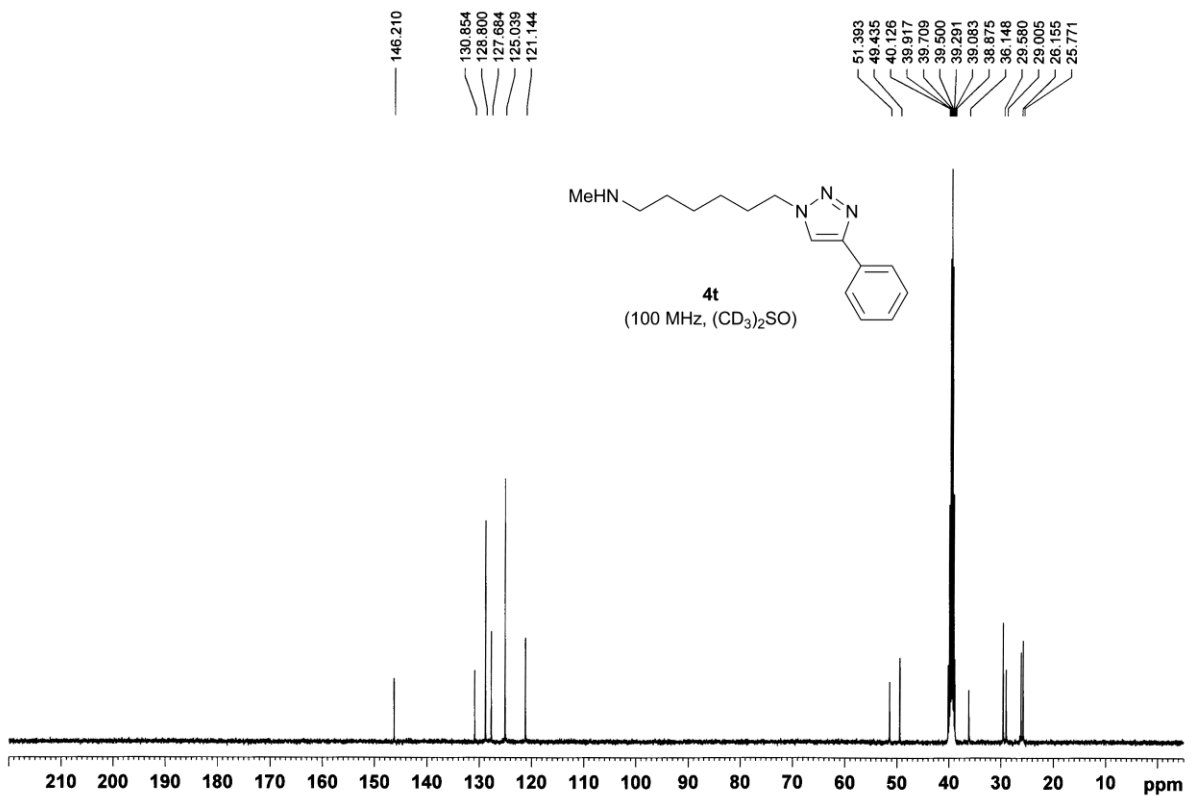

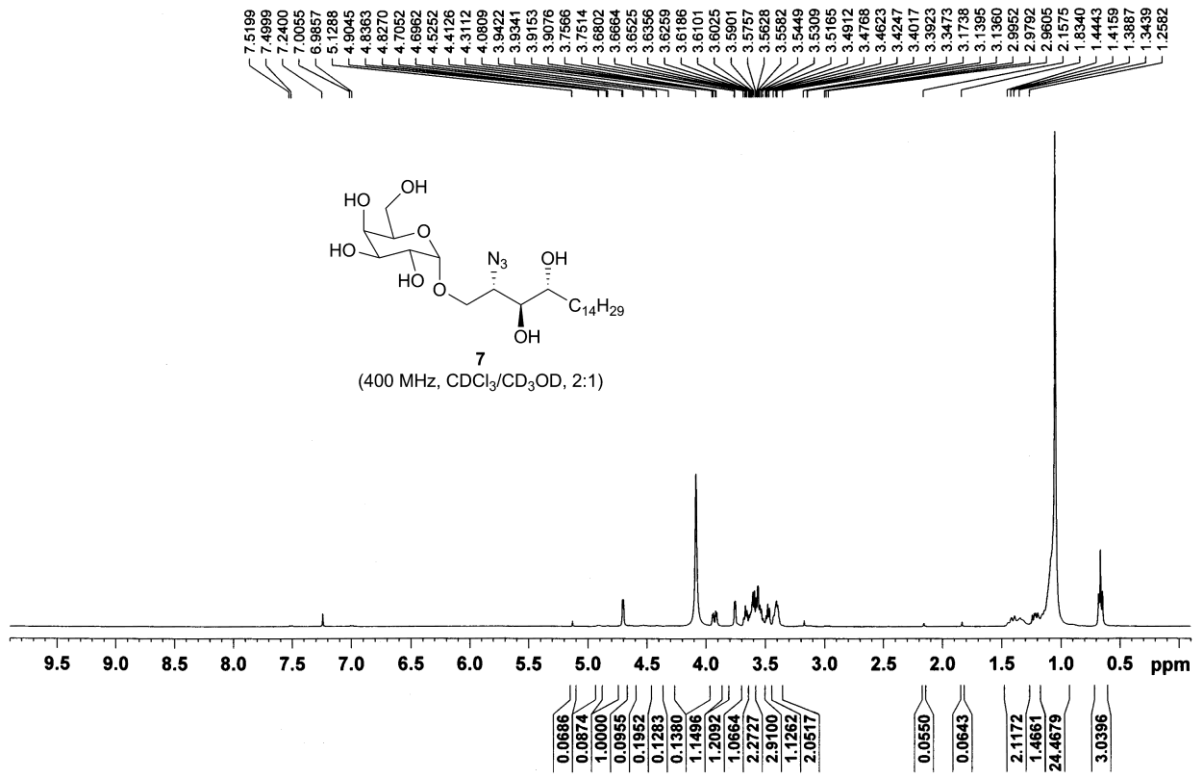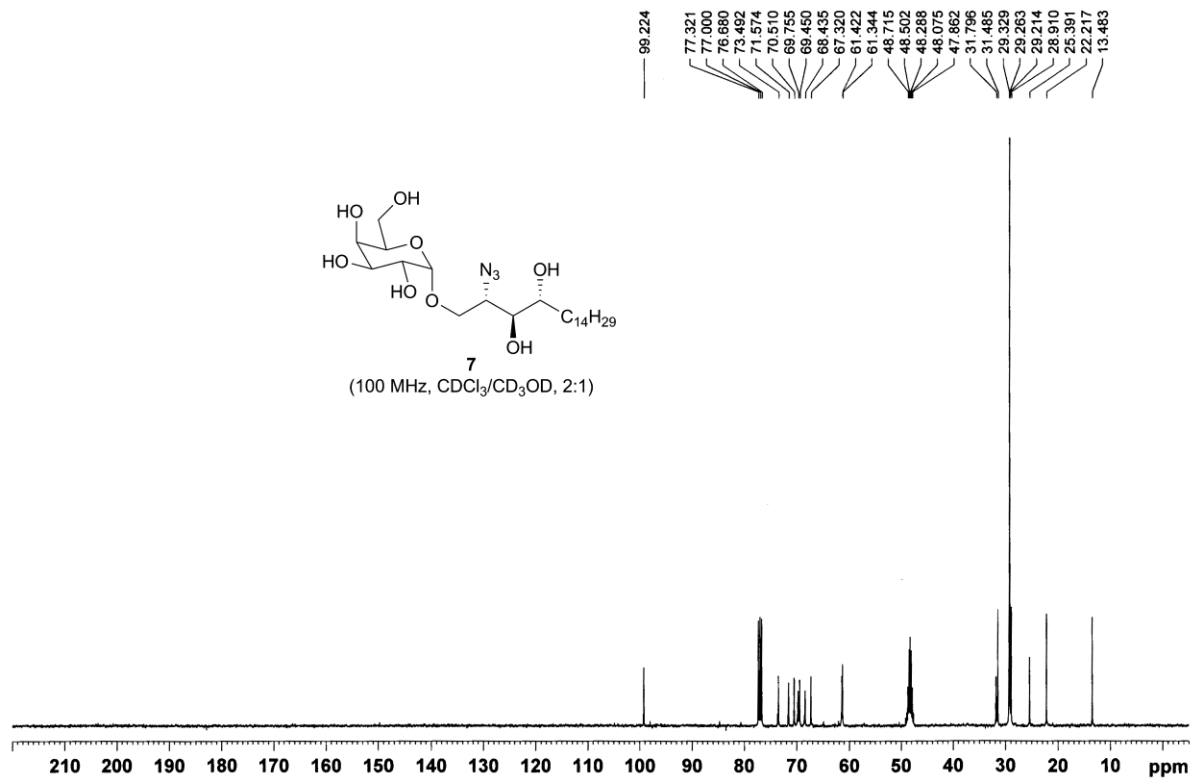

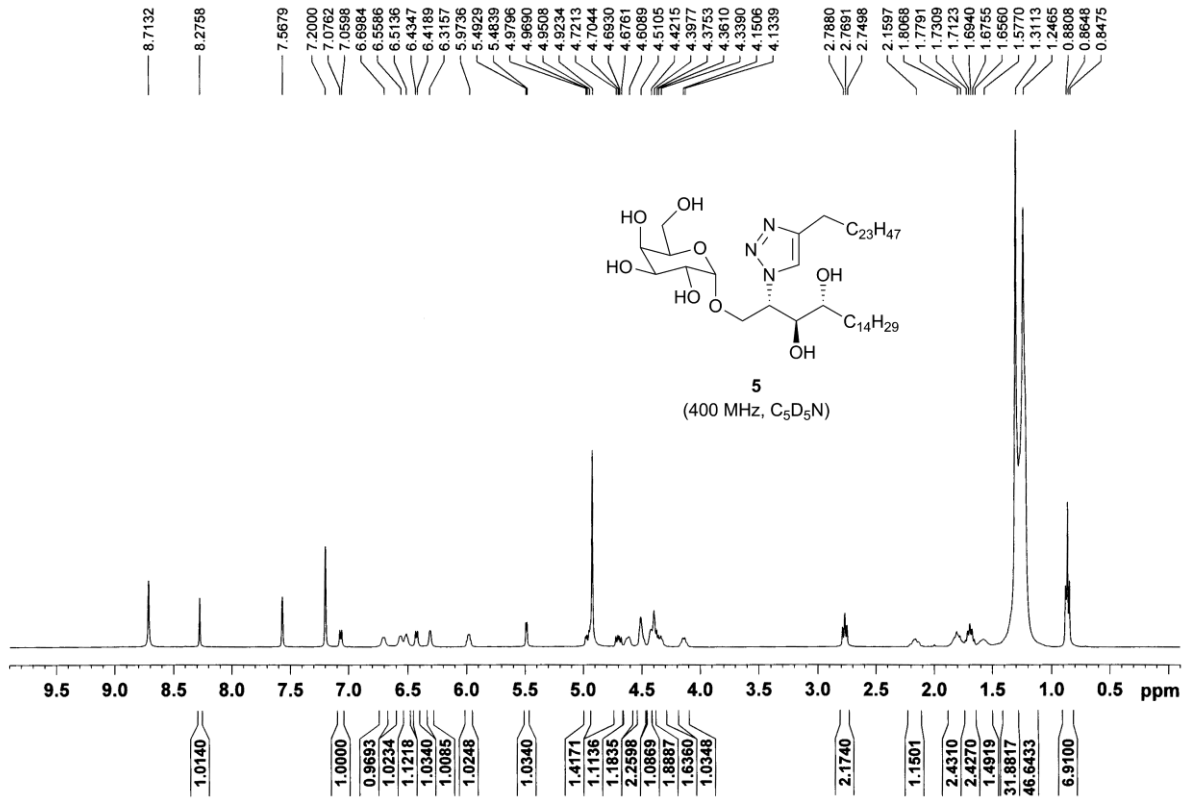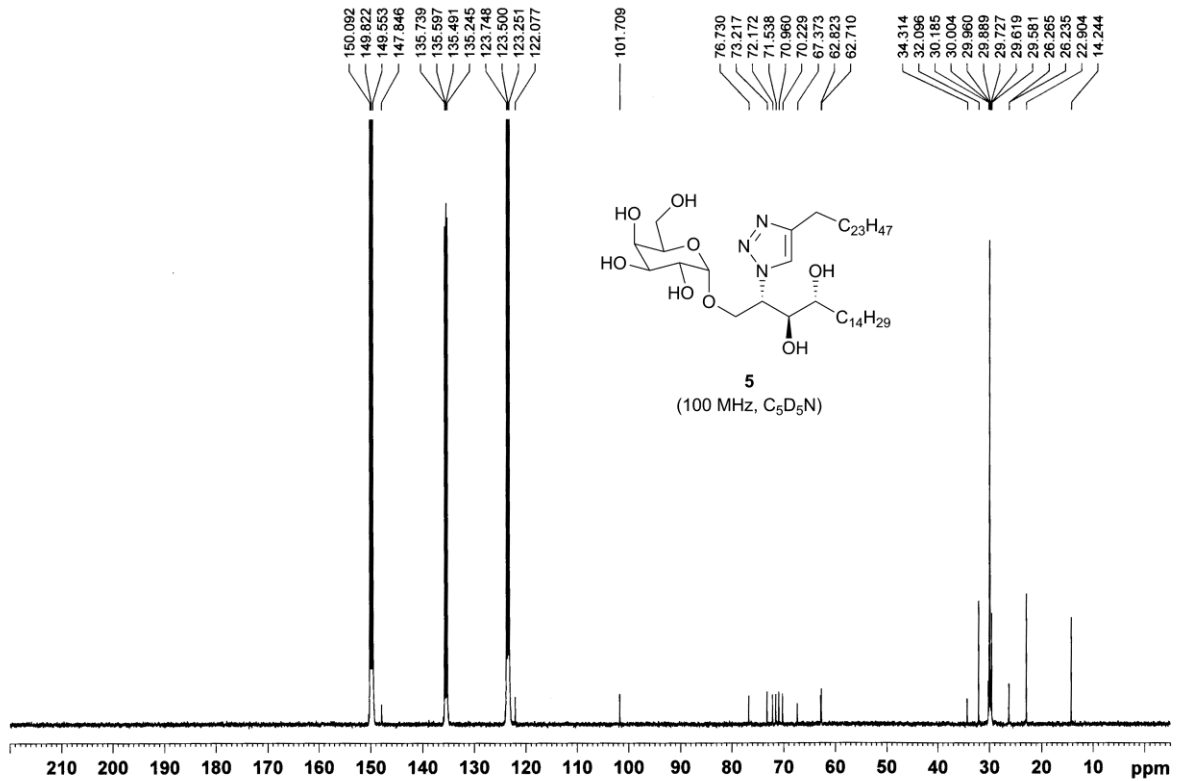

Supplement: c4ra03356f1.pdf [file c4ra03356f1.pdf]
